1 **Deterministic splicing of *Dscam2* is regulated by Muscleblind**

2 Joshua Shing Shun Li and S. Sean Millard

3 School of Biomedical Sciences, The University of Queensland, Brisbane, 4072,

4 Australia

5 Correspondence: s.millard@uq.edu.au

6

7 **Summary**

8 **Alternative splicing of genes increases the number of distinct proteins in a cell.**  
9 **In the brain it is highly prevalent, presumably because proteome diversity is**  
10 **crucial for establishing the complex circuitry between trillions of neurons. To**  
11 **provide individual cells with different repertoires of protein isoforms, however,**  
12 **this process must be regulated. Previously, we found that the mutually exclusive**  
13 **alternative splicing of a cell surface protein, *Dscam2* produces two isoforms**  
14 **(exon 10A and 10B) with unique binding properties. This splicing event is tightly**  
15 **regulated and crucial for maintaining axon terminal size, dendritic morphology**  
16 **and synaptic numbers. Here, we show that *Drosophila* Muscleblind (Mbl), a**  
17 **conserved splicing factor implicated in myotonic dystrophy, controls *Dscam2***  
18 **alternative splicing. Removing *mbl* from cells that normally express isoform B**  
19 **induces the expression of isoform A and eliminates the expression of B,**  
20 **demonstrating that Mbl represses one alternative exon and selects the other. *Mbl***  
21 **mutants exhibit phenotypes that are also observed in flies engineered to express**  
22 **a single isoform. Consistent with these observations, *mbl* expression is cell-type-**  
23 **specific and correlates with the expression of isoform B. Our study demonstrates**  
24 **how the regulated expression of a splicing factor is sufficient to provide neurons**  
25 **with unique protein isoforms crucial for development.**

26

27

## 28 **Introduction**

29 Alternative splicing occurs in approximately 95% of human genes and generates  
30 proteome diversity much needed for brain wiring (Pan et al., 2008; Wang et al.,  
31 2008). Specifying neuronal connections through alternative splicing would require  
32 regulated expression of isoforms with unique functions in different cell types to carry  
33 out distinct processes. Although there are some examples of neuronal cell-type-  
34 specific isoform expression (Bell et al., 2004; Iijima et al., 2014; Lah et al., 2014;  
35 Norris et al., 2014; Schreiner et al., 2014; Tomioka et al., 2016), the mechanisms  
36 underlying these deterministic splicing events and their functional consequences  
37 remain understudied. This is due, in part, to the technical difficulties of assessing and  
38 manipulating isoform expression *in vivo*, and at the single cell level. Another obstacle  
39 is that most splicing regulators are proposed to be ubiquitously expressed (Nilsen and  
40 Graveley, 2010). For example, the broadly expressed SR and heterogeneous nuclear  
41 ribonucleoproteins (hnRNPs) typically have opposing activities, and the prevalence of  
42 splice site usage is thought to be controlled by their relative abundances within the  
43 cell (Blanchette et al., 2009). Although there are many examples where splicing  
44 regulators are expressed in a tissue-specific manner (Calarco et al., 2009; Kuroyanagi  
45 et al., 2006; Markovtsov et al., 2000; Ohno et al., 2008; Underwood et al., 2005;  
46 Warzecha et al., 2009), until recently, reports of cell-type specific expression have  
47 been less frequent (McKee et al., 2005; Wang et al., 2018).

48

49 In insects, *Dscam2* is a cell recognition molecule that mediates self- and cell-type-  
50 specific avoidance (tiling) (Funada et al., 2007; Millard et al., 2007; Millard et al.,

51 2010). Mutually exclusive alternative splicing of exon 10A or 10B produces two  
52 isoforms with biochemically unique extracellular domains that are regulated both  
53 spatially and temporally (Funada et al., 2007; Millard et al., 2007). Previously, we  
54 demonstrated that cell-type-specific alternative splicing of *Drosophila Dscam2* is  
55 crucial for the proper development of axon terminal size, dendrite morphology and  
56 synaptic numbers in the fly visual system (Kerwin et al., 2018; Lah et al., 2014; Li et  
57 al., 2015). Although these studies showed that disrupting cell-specific *Dscam2*  
58 alternative splicing has functional consequences, what regulates this process remained  
59 unclear. Here, we conducted an RNAi screen and identified *muscleblind (mbl)* as a  
60 regulator of *Dscam2* alternative splicing. Loss-of-function (LOF) and overexpression  
61 (OE) studies suggest that Mbl acts both as a splicing repressor of *Dscam2* exon 10A  
62 and as an activator of exon 10B (hereafter *Dscam2.10A* and *Dscam2.10B*). Consistent  
63 with this finding, *mbl* expression is cell-type-specific and correlates with the  
64 expression of *Dscam2.10B*. Hypomorphic *mbl* mutants exhibit visual system  
65 phenotypes that are similar to those observed in flies engineered to express one  
66 isoform in all *Dscam2*-positive cells (single isoform strains). Similarly, driving *mbl* in  
67 mushroom body neurons that normally select isoform A, induces the expression of  
68 isoform B and generates a single isoform phenotype. Although the *mbl* gene is itself  
69 alternatively spliced, we found that selection of *Dscam2.10B* does not require a  
70 specific Mbl isoform and that human MBNL1 can also regulate *Dscam2* alternative  
71 splicing. Our study provides compelling genetic evidence that the regulated  
72 expression of a highly conserved RNA binding protein, Mbl, is sufficient for the  
73 selection of *Dscam2.10B* and that disrupting this mechanism for cell-specific protein  
74 expression leads to developmental defects in neurons.

75

76

77 **Results**

78 **An RNAi screen identifies *mbl* as a repressor of *Dscam2* exon 10A selection**

79 We reasoned that the neuronal cell-type-specific alternative splicing of *Dscam2* is  
80 likely regulated by RNA binding proteins, and that we could identify these regulators  
81 by knocking them down in a genetic background containing an isoform reporter. In  
82 photoreceptors (R cells) of third instar larvae, *Dscam2.10B* is selected whereas the  
83 splicing of *Dscam2.10A* is repressed (Lah et al., 2014; Tadros et al., 2016). Given that  
84 quantifying a reduction in *Dscam2.10B* isoform reporter levels is challenging  
85 compared to detecting the appearance of *Dscam2.10A* in cells where it is not normally  
86 expressed, we performed a screen for repressors of isoform A in R cells.

87

88 To knock down RNA binding proteins, the *glass* multimer reporter (*GMR*)-*GAL4* was  
89 used to drive RNAi transgenes selectively in R cells. Our genetic background  
90 included *UAS-Dcr-2* to increase RNAi efficiency (Dietzl et al., 2007) and *GMR-GFP*  
91 to mark the photoreceptors independent of the *Gal4/UAS* system (Brand and  
92 Perrimon, 1993). Lastly, a *Dscam2.10A-LexA* reporter driving *LexAOp*-myristolated  
93 tdTomato (hereafter *Dscam2.10A>tdTom*; Fig. 1A) was used to visualize isoform A  
94 expression (Lai and Lee, 2006; Tadros et al., 2016). As expected,  
95 *Dscam2.10B>tdTom* was detected in R cell projections in the lamina plexus as well as  
96 in their cell bodies in the eye-disc, whereas *Dscam2.10A>tdTom* was not (Fig. 1C-  
97 1D). Overexpression of Dcr-2 in R cells did not perturb the repression of  
98 *Dscam2.10A* (Fig 1O). We knocked down ~160 genes using ~250 RNAi lines (Fig 1B  
99 and Table S1) and identified two independent RNAi lines targeting *mbl* that caused  
100 aberrant expression of *Dscam2.10A* in R cells where it is normally absent (Fig 1F,



101 1O). The penetrance increased when animals were reared at a more optimal Gal4  
102 temperature of 29°C (Mondal et al., 2007; Ni et al., 2008) (Fig 1O).  
103  
104 Mbl-family proteins possess evolutionarily conserved tandem CCCH zinc-finger  
105 domains through which they bind pre-mRNA. Vertebrate Mbl family members are  
106 involved in tissue-specific splicing and have been implicated in myotonic dystrophy  
107 (Pascual et al., 2006). Formerly known as *mindmelt*, *Drosophila mbl* was first  
108 identified in a second chromosome *P*-element genetic screen for embryonic defects in  
109 the peripheral nervous system (Kania et al., 1995). *Mbl* produces multiple isoforms  
110 through alternative splicing (Begemann et al., 1997; Irion, 2012), and its function has  
111 been most extensively characterized in fly muscles where both hypomorphic  
112 mutations and sequestration of the protein by repeated CUG sequences within an  
113 mRNA lead to muscle defects (Artero et al., 1998; Llamusi et al., 2013). To validate  
114 the RNAi phenotype, we tested *Dscam2.10A>tdTom* expression in *mbl* loss-of-  
115 function (LOF) mutants. Since *mbl* LOF results in lethality, we first conducted  
116 complementation tests on six *mbl* mutant alleles to identify viable hypomorphic  
117 combinations. These included two alleles created previously via imprecise *P*-element  
118 excision (*mbl<sup>e127</sup>* and *mbl<sup>e27</sup>*; Begemann et al. 1997) two MiMIC splicing traps  
119 (*mbl<sup>MI00976</sup>* and *mbl<sup>MI04093</sup>*; (Venken et al., 2011) and two 2<sup>nd</sup> chromosome deficiencies  
120 (*Df(2R)BSC154* and *Df(2R)Exel6066*; Fig 1F-1G). Consistent with previous reports,  
121 the complementation tests confirmed that the majority of the alleles were lethal over  
122 one another (Fig 1G) (Kania et al., 1995). However, we identified two *mbl*  
123 transheterozygous combinations that were partially viable and crossed these into a  
124 *Dscam2.10A>tdTom* reporter background. Both *mbl<sup>e127</sup>/mbl<sup>MI00976</sup>* and  
125 *mbl<sup>MI04093</sup>/mbl<sup>MI00976</sup>* animals presented aberrant *Dscam2.10A* expression in R cells

126 when compared to heterozygous and wild-type controls (Fig 1H-O). *Mbl* mutant  
127 mosaic clones also exhibited aberrant *Dscam2.10A>tdTom* expression in R cells (Fig  
128 S1A-S1F). The weakest allele, *mbl*<sup>M100976</sup>, which removes only a proportion of the *mbl*  
129 isoforms, was the only exception (Fig S1E-S1F).

130

131 One alternative explanation of how *Dscam2.10A>tdTom* expression could get  
132 switched-on in *mbl* mutants, is through exon 10 skipping. Removing both alternative  
133 exons simultaneously does not result in a frameshift mutation, and since the Gal4 in  
134 our reporters is inserted directly downstream of the variable exons (in exon 11), it  
135 would still be expressed. To test this possibility, we amplified *Dscam2* sequences  
136 between exon 9 and 11 in *mbl*<sup>e127</sup>/*mbl*<sup>M100976</sup> transheterozygous animals using RT-PCR.  
137 In both control and *mbl* LOF mutants, we detected RT-PCR products (~690bp) that  
138 corresponded to the inclusion of exon 10 (A or B) and failed to detect products  
139 (~390bp) that would result from exon 10 skipping (Fig 1P). This suggested that Mbl  
140 is not involved in the splicing fidelity of *Dscam2.10* but rather in the selective mutual  
141 exclusion of its two isoforms. To assess whether the ratios of the two isoforms were  
142 changing in the *mbl* hypomorphic mutants, we cut the exon 10 RT-PCR products with  
143 the *ClaI* restriction enzyme that only recognizes exon 10A. Densitometric analysis  
144 then allowed us to semi-quantitatively compare the relative levels of both isoforms.  
145 There was ~25% increase in the level of exon 10A inclusion in *mbl*<sup>e127</sup>/*mbl*<sup>M100976</sup>  
146 animals compared to controls (Fig 1P). Similarly, qRT-PCR of the *mbl*<sup>e127</sup>/*mbl*<sup>M100976</sup>  
147 animals showed a ~1.25 fold and ~0.78 fold change in exon 10A and 10B inclusion  
148 respectively, when compared to controls. Both results are consistent with the de-  
149 repression we observed in our 10A reporter lines. To determine whether Mbl was  
150 specifically regulating *Dscam2* exon 10 mutually exclusive splicing, we assessed

151 other *Dscam2* alternative splicing events. These included an alternative 5' splice site  
152 selection of *Dscam2* exon 19 and the alternative last exon (ALE) selection of exon 20  
153 (Fig S2A). The expression of these different isoforms was unchanged in *mb1*  
154 hypomorphic mutants (Fig S2B). Together, our results indicate that Mbl is an  
155 essential splicing factor that specifically represses *Dscam2.10A*.

156

### 157 **Mbl is necessary for the selection of *Dscam2* exon 10B**

158 Since *Dscam2* exon 10 isoforms are mutually exclusively spliced, we predicted that  
159 selection of exon 10A would lead to the loss of exon 10B selection. To test this, we  
160 conducted mosaic analysis with a repressible cell marker (MARCM) (Lee and Luo,  
161 1999) to analyse *Dscam2.10B* expression in *mb1* mutant clones. In late third instar  
162 brains, clones homozygous (GFP-positive) for *mb1<sup>e127</sup>* and *mb1<sup>e27</sup>* exhibited a dramatic  
163 reduction in *Dscam2.10B>tdTom* expression in R cell axons projecting to the lamina  
164 plexus compared to controls (Fig 2B, C, E). The absence of *Dscam2.10B>tdTom* in  
165 *mb1* mutant clones was more striking during pupal stages (Fig 2D), suggesting that  
166 perdurance of Mbl could explain the residual signal observed in third instar animals.  
167 These results reveal that *mb1* is cell-autonomously required for the selection of the  
168 *Dscam2.10B*.

169

### 170 ***mb1* expression is cell-type-specific and correlates with *Dscam2.10B* selection**

171 Previous studies have reported that *mb1* is expressed in third instar eye-discs and  
172 muscles (Artero et al., 1998; Brouwer et al., 1997). Since *mb1* LOF results in both the  
173 selection of *Dscam2.10A* and the loss of *Dscam2.10B*, we predicted that *mb1*  
174 expression would correlate with the presence of isoform B. To test this, we  
175 characterized several *mb1* reporters (Fig S3A). We analyzed three enhancer trap

176 strains (transcriptional reporters) inserted near the beginning of the *mbl* gene  
177 (*mbl*<sup>K01212</sup>-*LacZ*, *mbl*<sup>NP1161</sup>-*Gal4* and *mbl*<sup>NP0420</sup>-*Gal4*), as well as a splicing trap line  
178 generated by the Trojan-mediated conversion of a *mbl* MiMIC (Minos Mediated  
179 Integration Cassette) insertion (Fig S2A, *mbl*<sup>MiMIC00139</sup>-*Gal4*; (Diao et al., 2015). The  
180 splicing trap reporter consists of a splice acceptor site and an in-frame *T2A-Gal4*  
181 sequence inserted in an intron between two coding exons. This *Gal4* cassette gets  
182 incorporated into *mbl* mRNA during splicing and therefore Gal4 is only present when  
183 *mbl* is translated. Consistent with previous studies, and its role in repressing the  
184 production of *Dscam2.10A*, all four *mbl* reporters were expressed in the third instar  
185 photoreceptors (Fig 3A, S3A-S3D). We next did a more extensive characterization of  
186 *mbl* expression by driving nuclear localized GFP (*GFP.nls*) with one transcriptional  
187 (*mbl*<sup>NP0420</sup>-*Gal4*) and one translational (*mbl*<sup>MiMIC00139</sup>-*Gal4*) reporter. In the brain, we  
188 found that *mbl* was expressed predominantly in postmitotic neurons with some  
189 expression detected in glial cells (Fig SEC-S3H and S3J-S3M). Interestingly, we  
190 detected the translational but not the transcriptional reporter in third instar muscles  
191 (Fig S3I and S3N). The absence of expression is likely due to the insertion of the *P*-  
192 element into a neural-specific enhancer, as previously described (Bargiela et al.,  
193 2014). To assess the expression of *mbl* in the five lamina neurons L1- L5, all of which  
194 express *Dscam2* (Lah et al., 2014; Tadros et al., 2016), we implemented an  
195 intersectional strategy using a *UAS>stop>epitope* reporter (Nern et al., 2015) that is  
196 dependent on both *FLP* and *Gal4*. The *FLP* source (*Dac-FLP*) was expressed in  
197 lamina neurons and able to remove the transcriptional stop motif in the reporter  
198 transgene. The overlap between *mbl-Gal4* and *Dac-FLP* allowed us to visualize *mbl*  
199 expression in lamina neurons at single-cell resolution (Fig 3B). As a proof of  
200 principle, we first did an intersectional analysis with a pan-neuronal reporter, *elav-*

201 *Gal4* (Fig 3C<sub>1</sub>). We detected many clones encompassing various neuronal-cell-types  
202 including the axons of L1-L5 and R7-R8 (Fig 3C-3D). This confirmed that all lamina  
203 neurons could be detected using this strategy. Using *mbl-Gal4* reporters we found  
204 that L1, R7 and R8, which expresses *Dscam2.10B*, were the primary neurons labelled.  
205 A few L4 cells were also detected, which is consistent with this neuron expressing  
206 *Dscam2.10B* early in development and *Dscam2.10A* at later stages (Tadros et al.,  
207 2016). To confirm this finding, we dissected the expression of *mbl* in lamina neurons  
208 during development. Using the same intersectional strategy, we detected a high  
209 number of L4 clones at 48hr apf (30%, n=10). This was followed by a decline at 60hr  
210 apf (26.7%, n = 30) and 72hr apf (11.8%, n = 85) reaching the lowest at eclosion (Fig  
211 S4A and S4B; 1.7%, n=242). Thus, *mbl* expression in L4 neurons mirrors the  
212 expression of *Dscam2.10B*. Consistent with this, L2, L3 and L5, were all detected  
213 using the intersectional strategy with *Dscam2.10A-Gal4* but were not labelled using  
214 *mbl-Gal4* (Fig 3E). The expression of *mbl* is further strengthened by an independent  
215 RNA-seq study of isolated lamina neurons during development, where *mbl* is detected  
216 at high levels in L1, R7 and R8 neurons (~5-100 fold more than L2-L5)(Tan et al.,  
217 2015). Together, these results show *mbl* expression correlates with the cell-type-  
218 specific alternative splicing of *Dscam2.10B*. Importantly, this suggests that simply the  
219 presence or absence of *mbl* can determine the selection of the *Dscam2.10* isoform in a  
220 cell.

221

222 **Ectopic expression of multiple *mbl* isoforms is sufficient to promote the selection**  
223 **of *Dscam2* exon 10B**

224 Since cells that select *Dscam2.10B* express *mbl* and cells that select *Dscam2.10A* lack  
225 *mbl*, we wondered whether it was sufficient to promote exon 10B selection in

226 *Dscam2.10A*-positive cells. To test this, we ectopically expressed *mbl* with a  
227 ubiquitous driver (*Act5c-Gal4*) and monitored isoform B expression using  
228 *Dscam2.10B>tdTom*. We focussed on the mushroom body (MB), as this tissue  
229 expresses isoform A specifically in  $\alpha'\beta'$  neurons at 24hr apf where *mbl* is not  
230 detected (Fig 3G-3H, 4A-4C). Consistent with our prediction, ectopic expression of  
231 *mbl* using an enhancer trap containing a *UAS* insertion at the 5' end of the gene  
232 (*Act5c>mbl<sup>B2-E1</sup>*), switched on *Dscam2.10B* in  $\alpha'\beta'$  MB neurons, where it is normally  
233 absent (Fig 4D). Driving *mbl* with a MB-specific *Gal4* (*OK107*) gave similar results  
234 (Fig 4E). Although our two *Gal4* drivers expressed *mbl* in all MB neurons,  
235 *Dscam2.10B* was only observed in  $\alpha'\beta'$  neurons, demonstrating that transcription of  
236 *Dscam2* is a pre-requisite for this splicing modulation. Previous studies have  
237 suggested that the *mbl* gene is capable of generating different isoforms with unique  
238 functions depending on their subcellular localization (Vicente et al., 2007). This also  
239 includes the production of a highly abundant circular RNA that can sequester the Mbl  
240 protein (Ashwal-Fluss et al., 2014; Houseley et al., 2006). To assess whether *Dscam2*  
241 exon 10B selection is dependent on a specific alternative variant of Mbl, we  
242 overexpressed the cDNAs of fly *mbl* isoforms (*mblA*, *mblB* and *mblC*; (Begemann et  
243 al., 1997; Juni and Yamamoto, 2009) as well as an isoform of the human *MBNL1* that  
244 lacks the linker region optimal for CUG repeat binding (*MBNL1<sub>35</sub>*; (Kino et al., 2004;  
245 Li et al., 2008) with either *Act5c-Gal4* or *OK107-Gal4*. These constructs all possess  
246 the tandem N-terminal CCCH motif that binds to YCGY sequences and lack the  
247 ability to produce *mbl* circRNA. In all cases, overexpression resulted in the  
248 misexpression of *Dscam2.10B* in  $\alpha'\beta'$  MBs (with the exception *Act5C>mblC*, which  
249 resulted in lethality; Fig 4D-4E). Using semi-quantitative RT-PCR from the  
250 *Act5C>mbl* flies, we demonstrated that overexpression of *mbl* did not lead to exon 10

251 skipping and that it increased exon 10B selection by 8-24% (Fig 4F), depending on  
252 the *mb1* isoform used. The inability of Mbl to completely inhibit exon 10A selection  
253 suggests that other factors or mechanisms may also contribute to cell-specific *Dscam2*  
254 isoform expression (see Discussion). These results suggest that Mbl protein isoforms  
255 are all capable of *Dscam2.10B* selection and independent of *mb1* circRNA. The ability  
256 of human MBNL1 to promote the selection of exon 10B suggests that the regulatory  
257 logic for *Dscam2* splicing is likely conserved in other mutually-exclusive cassettes in  
258 higher organisms. Together, our results show that all *mb1* isoforms are sufficient to  
259 promote *Dscam2.10B* selection.

260

### 261 **Mbl regulates cell-type-specific *Dscam2* alternative splicing in lamina neurons**

262 To determine whether the regulatory logic of *Dscam2* alternative splicing is consistent  
263 in other cell types, we manipulated *mb1* expression in lamina neurons (L1-L5). We  
264 first asked whether *mb1* LOF resulted in the de-repression of *Dscam2.10A* in L1  
265 neurons. To do this, we visualized *Dscam2* isoform expression in L1-L5 using an  
266 intersectional strategy similar to Figure 3 but with a different *FLP* source (*27G05-*  
267 *FLP*). We detected L1 and L4 neurons when using the *Dscam2.10B-Gal4* reporter in a  
268 wild-type background, but not L2, L3 or L5. L1 was also not detected when using the  
269 *Dscam2.10A-Gal4* reporter, where L2-L5 cells were the primary neurons labelled (Fig  
270 5A). Consistent with our R cell results, de-repression of *Dscam2.10A* was observed in  
271 L1 neurons in *mb1* transheterozygous animals (*mb1<sup>e127</sup>/mb1<sup>M100976</sup>*) when compared to  
272 the corresponding heterozygous controls (*mb1<sup>e127</sup>/+* and *mb1<sup>M100976</sup>/+*, Fig 5A-5B). We  
273 next asked whether ectopic overexpression of *mb1* would result in aberrant  
274 *Dscam.10B* selection in L2, L3 and L5 neurons where it is usually repressed. For this  
275 experiment, the *Gal4/UAS* system was used to overexpress *mb1* and the *LexA/LexAop*

276 system was used to visualize *Dscam2* isoform expression. Using the same  
277 intersectional strategy, we found that *Dscam2-LexA* reporters showed similar patterns  
278 to the *Dscam2-Gal4* reporters (Fig 5C). Pan-neuronal overexpression (*elav-Gal4*) of  
279 *mbl* caused the aberrant detection of *Dscam2.10B* in L2, L3 and L5 cells that  
280 normally select *Dscam2.10A* (Fig 5C-5D). Together, our results show that Mbl  
281 regulates *Dscam2* cell-type-specific alternative splicing. Importantly, the simple  
282 presence or absence of *mbl* is sufficient to determine whether a cell expresses  
283 *Dscam2.10A* or *Dscam2.10B*.

284

### 285 **Manipulation of *mbl* expression generates phenotypes observed in *Dscam2* single** 286 **isoform mutants**

287 If Mbl regulates *Dscam2* alternative splicing, *mbl* LOF and OE animals should exhibit  
288 similar phenotypes to *Dscam2* isoform misexpression. Previously, we showed that  
289 flies expressing a single isoform of *Dscam2* exhibit a reduction in L1 axon arbour size  
290 and well as reduced dendritic width (Kerwin et al., 2018; Lah et al., 2014). These flies  
291 were generated using recombinase-mediated cassette exchange and express a single  
292 isoform in all *Dscam2*-positive cells (Lah et al., 2014). The reduction in axonal arbors  
293 and dendritic widths were proposed to be due to inappropriate interactions between  
294 cells that normally express different isoforms. Consistent with these previous studies,  
295 we observed a reduction in the area of L1 axon arbors (more prominent in m1 than in  
296 m5, Fig 5E-5F and 5I-5J) and the width of dendritic arrays (Fig 5G-5H and 5G) in  
297 *mbl* transheterozygous animals (*mbl<sup>e127</sup>/mbl<sup>MI00976</sup>*) when compared to controls. Finally,  
298 we observed a phenotype in MB neurons overexpressing *mbl* where the  $\beta$  lobe  
299 neurons inappropriately crossed the midline (Fig S5A-S5C). Interestingly, a similar  
300 phenotype was observed in *Dscam2A* single isoform mutants. These data demonstrate



301 that MB phenotypes generated in animals overexpressing *mbl*, phenocopy *Dscam2*  
302 single isoform mutants. While the origin of this non-autonomous phenotype is not  
303 known, it correlates with the misregulation of *Dscam2* alternative isoform expression.

304

### 305 **Discussion**

306 In this study, we identify Mbl as a regulator of *Dscam2* alternative splicing. We  
307 demonstrate that removing *mbl* in a *mbl*-positive cell-type results in a switch from  
308 *Dscam2.10B* to *Dscam2.10A* selection. Ectopic expression of a variety of Mbl protein  
309 isoforms in a normally *mbl*-negative neuronal cell-type is sufficient to trigger the  
310 selection of *Dscam2.10B*. Consistent with this, transcriptional reporters demonstrate  
311 that *mbl* is expressed in a cell-type-specific manner in multiple cell-types, which  
312 tightly correlates with *Dscam2.10B*. Lastly, both *mbl* LOF and misexpression lead to  
313 phenotypes that are observed in flies that express a single *Dscam2* isoform.

314

315 Our data demonstrate that *mbl* is expressed in a cell-specific fashion. In the lamina of  
316 the fly visual system, L1 and L2 neurons are developmentally very similar in terms of  
317 both morphology and gene expression (Bausenwein et al., 1992; Fischbach and  
318 Dittrich, 1989; Tan et al., 2015). The difference in *mbl* expression between these two  
319 cells is critical for their development as when expression of this splicing factor is  
320 perturbed, both cells express the same isoforms and inappropriate *Dscam2*  
321 interactions lead to phenotypes in their axons and dendrites. Although, cell-specific  
322 *mbl* expression has been alluded to previously (Huang et al., 2008; Machuca-Tzili et  
323 al., 2011; Norris et al., 2017), our study demonstrates that *mbl* regulation of *Dscam2*  
324 alternative splicing has functional consequences. Mbl appears to be regulated at the  
325 transcriptional level since the enhancer-trap as well as splicing-trap reporters lack the

326 components crucial for post-transcriptional regulation yet still exhibit cell-type-  
327 specific expression (Fig 3). This was unexpected as a recent study showed that *mbl*  
328 encodes numerous alternative isoforms that could be individually post-  
329 transcriptionally repressed by different microRNAs, thus bypassing the need for  
330 transcriptional control of the gene. It will be interesting to explore the *in vivo*  
331 expression patterns of other splicing factors in *Drosophila* to determine whether cell-  
332 specific expression of a subset of splicing factors is a common mechanism for  
333 regulating alternative splicing in the brain.

334

335 The expression pattern of *mbl* and its ability to simultaneously repress exon 10A and  
336 select exon 10B suggest that this RNA binding protein and its associated co-factors  
337 are sufficient to regulate cell-type-specific splicing of *Dscam2*. *Dscam2.10A* could be  
338 the default exon selected when the Mbl complex is absent. In this way, cells that  
339 express *mbl* select *Dscam2.10B*. Consistent with this, ectopic expression of *mbl* in  
340 *mbl*-negative cells (L2, L3, L5 &  $\alpha'\beta'$  neurons) results in the aberrant selection of  
341 exon 10B. Our RT-PCR data, however, argue that *Dscam2* mutually exclusive  
342 alternative splicing may be more complicated than this model. Ubiquitous expression  
343 of *mbl* increased exon B inclusion modestly (up to 24%) as measured by RT-PCR  
344 (see Fig 4F). One might expect a more pronounced shift to isoform B if Mbl were the  
345 only regulator/mechanism involved. Further studies, including screens for repressors  
346 of exon 10B, will be required to resolve this issue.

347

348 The L1 axon and dendrite phenotypes generated through the LOF and ectopic  
349 expression of *mbl*, respectively, demonstrate that this splicing factor regulates aspects  
350 of neurodevelopment through cell-specific expression of *Dscam2* isoforms. In the

351 lamina, *mbl* expression in L1, and its absence in L2, permits these neurons to express  
352 distinct *Dscam2* proteins that cannot recognise each other. Phenotypes arise in these  
353 neurons both when they are engineered to express the same isoform (Kerwin et al.,  
354 2018; Lah et al., 2014) and when *mbl* is misregulated (Fig 5). These data strongly link  
355 the regulation of cell-specific *Dscam2* splicing with normal neuron development.  
356 *Mbl* overexpression also generates a midline crossing phenotype in MB neurons that  
357 is similar to that observed in animals expressing a single isoform. This phenotype is  
358 complicated, however, by the observation that *Dscam2.10A*, but not *Dscam2.10B*,  
359 animals show a statistically significant increase in midline crossing compared to  
360 controls (Fig S4). This issue may have to do with innate differences between isoform  
361 A and isoform B that are not completely understood. It is possible that isoform A and  
362 B are not identical in terms of signalling due to either differences in homophilic  
363 binding or differences in co-factors associated with specific isoforms. Consistent with  
364 this notion, we previously reported that *Dscam2.10A* single isoform lines produce  
365 stronger phenotypes at photoreceptor synapses compared to *Dscam2.10B* (Kerwin et  
366 al., 2018).

367

368 Together, our results demonstrate that the simple presence or absence of a splicing  
369 factor can affect neurodevelopment through the cell-specific selection of distinct  
370 isoforms of a cell surface protein. Although we provide compelling genetic evidence  
371 of how *Mbl* regulates the alternative splicing of *Dscam2*, the regulatory logic we  
372 discovered for *Dscam2* is likely to extend to cover the splicing events of many other  
373 genes crucial for neurodevelopment. Developmental analysis of *mbl* expression in the  
374 cells studied here suggests that it turns on after neurons have obtained their identity  
375 (similar to *Dscam2*) and is therefore well suited for regulating processes such as axon

376 guidance and synapse specification. Identifying these splicing events may provide  
377 clues into how the brain can diversify and regulate its repertoire of proteins to  
378 promote neural connectivity.

379

## 380 **Experimental procedures**

### 381 **Fly strains**

382 *Dscam2.10A-LexA* and *Dscam2.10B-LexA* (Tadros et al., 2016), *UAS-Dcr2* and *UAS-*  
383 *mbl-RNAi*<sup>VDRC28732</sup> (Dietzl et al., 2007), *LexAop-myr-tdTomato* (attP2, (Chen et al.,  
384 2014), *UAS-Srp54-RNAi*<sup>TRiP.HMS03941</sup>, *CadN-RNAi*<sup>TRiP.HMS02380</sup> and *UAS-mbl-*  
385 *RNAi*<sup>TRiP.JF03264</sup> (Ni et al., 2008), *UAS-mCD8-GFP* (Lee and Luo, 1999), *FRT42D* (Xu  
386 and Rubin, 1993), *mbl*<sup>e127</sup> and *mbl*<sup>e27</sup> (Begemann et al., 1997), *mbl*<sup>M100976</sup> and *mbl*<sup>M104093</sup>  
387 (Venken et al., 2011), *Df(2R)BSC154* (Cook et al., 2012), *Df(2R)Exel6066* (Parks et  
388 al., 2004), *ey-FLP* (Chr.1, (Newsome et al., 2000), *GMR-myr-GFP*, *mbl*<sup>NP0420</sup>-*Gal4*  
389 and *mbl*<sup>NP1161</sup>-*Gal4* (Hayashi et al., 2002), *mbl*<sup>k01212</sup>-*LacZ* (Spradling et al., 1999),  
390 *mbl*<sup>MiMIC00139</sup>-*Gal4* (H. Bellen Lab), *Dac-FLP* (Chr.3, (Millard et al., 2007),  
391 *UAS>stop>myr::smGdP-V5-THS-UAS>stop>myr::smGdP-cMyc* (attP5, (Nern et al.,  
392 2015), *Dscam2.10A-Gal4* and *Dscam2.10B-Gal4* (Lah et al., 2014) *Act5C-Gal4*  
393 (Chr.3, from Yash Hiromi), *OK107-Gal4* (Connolly et al., 1996), *UAS-mblA*, *UAS-*  
394 *mblB* and *UAS-mblC* (D. Yamamoto Lab), *P{EP}mbl*<sup>B2-E1</sup>, *UAS-mblA-FLAG* and  
395 *UAS-MBNLI*<sub>35</sub> (Li et al., 2008).

396

### 397 **RNAi screening**

398 The RNAi screen line was generated as follows: *GMR-Gal4* was recombined with  
399 *GMR-GFP* on the second chromosome. *Dscam2.10A-LexA* (Tadros et al. 2016) was  
400 recombined with *LexAop-myr-tdTomato* on the third chromosome. These flies were

401 crossed together with *UAS-Dcr-2* (X) to make a stable RNAi screen stock. UAS-  
402 RNAi lines were obtained from Bloomington and VDRC. Lethal UAS-RNAi stocks  
403 were placed over balancers with developmentally selectable markers. Virgin females  
404 were collected from the RNAi screen stock, crossed to UAS-RNAi males and reared  
405 at 25°C. Wandering third instar larvae were dissected and fixed. We tested between  
406 one to three independent RNAi lines per gene. In total, we imaged ~2300 third instar  
407 optic lobes without antibodies using confocal microscopy at 63X. RNAi lines tested  
408 are listed in Table S1.

409

#### 410 **Semiquantitative and quantitative RT-PCR**

411 Total RNA was isolated using TRIzol (Ambion) following the manufacturer's  
412 protocol. Reverse transcription was performed on each RNA sample with random  
413 primer mix (semiquantitative, NEB) or Oligo-dT (qRT-PCR, NEB) using 200 units of  
414 M-MULV (NEB) and 1 µg of RNA in a 20 µL reaction, at 42°C for 1 hr. PCR  
415 reactions were set up with specific primers to analyse alternative splicing of various  
416 regions of *Dscam2*. Where possible, semi-quantitative PCR was performed to  
417 generate multiple isoforms in a single reaction and relative levels were compared by  
418 electrophoresis followed by densitometry. For qRT-PCR, 1µL of CDNA were added  
419 to a Luna Universal SYBR-Green qPCR Master Mix kit (NEB). Samples were added  
420 into a 200µL 96-well plate and read on the QuantStudio™ 6 Flex Real-Time PCR  
421 machine. Rq values were calculated in Excel (Microsoft).

422

#### 423 **Immunohistochemistry**

424 Immunostaining were conducted as previously described (Lah et al. 2014). Antibody  
425 dilutions used were as follows: mouse mAb24B10 (1:20; DSHB), mouse anti-Repo

426 (1:20; DSHB), mouse anti-DAC (1:20; DSHB), mouse anti-Fas2 (1:20; DSHB) rat  
427 anti-ELAV (1:200), V5-tag:DyLight anti-mouse 550 (1:500; AbD Serotec), V5-  
428 tag:DyLight anti-mouse 405 (1:200; AbD Serotec), myc-tag:DyLight anti-mouse 549  
429 (1:200; AbD Serotec), Phalloidin:Alexa Fluor 568 (1:200; Molecular Probes),  
430 DyLight anti-mouse 647 (1:2000; Jackson Laboratory), DyLight Cy3 anti-rat (1:2000;  
431 Jackson Laboratory).

432

### 433 **Image acquisition**

434 Imaging was performed at the School of Biomedical Sciences Imaging Facility.  
435 Images were taken on a Leica SP8 laser scanning confocal system with a 63X  
436 Glycerol NA 1.3.

437

### 438 **Fly genotypes**

439 Specific genotypes can be found in the supplemental text.

440

### 441 **Author contribution**

442 J.S.S.L designed and performed all experiments. S.S.M supervised the project. J.S.S.L  
443 and S.S.M wrote the manuscript.

444

### 445 **Acknowledgements**

446 We thank Wael Tadros, Yi Chen, Larry Zipursky, Greg Neely, Louis O'Keefe, Nancy  
447 Bonini, Aljoscha Nern and Bloomington Stock Center for sharing fly stocks. We  
448 thank the Daisuke Yamamoto Lab for constructing the *UAS-mbl* lines deposited and  
449 maintained at the Kyoto Stock Center. We thank Shaun Walters for technical  
450 assistance on the Leica confocal microscopy. We note that Grace Shin initially

451 observed *Dscam2* isoform expression in the adult mushroom bodies. We thank Kevin  
452 Mutemi for his thorough characterization of *Dscam2* isoform expression in mushroom  
453 bodies during development and all midline crossing defects in *Dscam2* single isoform  
454 mutant animals. We thank Wei Jun Tan for the heroic feat of triple balancing *OK107-*  
455 *Gal4*. We also thank members of the Millard, Pecot, Hilliard and van Swinderen lab  
456 for their feedback. The RNAi screen was inspired by the works of Hidehito  
457 Kuroyanagi. This work was supported by the National Health and Medical Research  
458 Council of Australia (NHMRC grant APP1021006). J.S.S.L was supported by the  
459 Australia Postgraduate Award (Research Training Scheme) from the Australian  
460 Federal Government and the Lavidis grant in aid.

461

462

463 **Figure legends**

464 **Figure 1.** *Drosophila mbl* is required for the repression of *Dscam2* exon 10A in R  
465 cells. (A) Schematic showing the region of *Dscam2* exon 10 that undergoes mutually  
466 exclusive alternative splicing and the LexA isoform-specific reporter lines. Frame-  
467 shift mutations in the exon not reported are shown. (B) Schematic RNAi screen  
468 design for identifying repressors of *Dscam2* exon 10A selection. R cells normally  
469 select exon 10B and repress exon 10A. We knocked-down RNA binding proteins in R  
470 cells while monitoring 10A expression.  
471 (C-E) *Dscam2* exon 10A is derepressed in R cells when *mbl* is knocked-down. (C<sub>1</sub>-C<sub>3</sub>)  
472 *Dscam2.10B* control. R cells (green) normally select exon 10B (red). R cell terminals  
473 can be observed in the lamina plexus (angle brackets). *Dscam2.10B* is also expressed  
474 in the developing optic lobe (arrowhead). (D<sub>1</sub>-D<sub>3</sub>) *Dscam2.10A* is not expressed in R  
475 cells (green) but is expressed in the developing optic lobe (arrowhead). (E<sub>1</sub>-E<sub>3</sub>) RNAi  
476 lines targeting *mbl* in R cells results in the aberrant expression of *Dscam2.10A* in R  
477 cells.  
478 (F) Schematic of the *mbl* gene showing the location of two small deletions (*E27* and  
479 *E127*), two MiMIC insertions (*MI04093* and *MI00976*) and two deficiencies  
480 (*Df(2R)Exel6066* and *Df(2R)BSC154*) used in this study. Non-coding exons are in  
481 gray, coding exons are black.  
482 (G) Complementation test of *mbl* loss-of-function (LOF) alleles. Numbers in the table  
483 represent the number of non-*CyO* offspring over the total. Most transheterozygote  
484 combinations were lethal with the exception of *mbl*<sup>MI00976</sup>/*mbl*<sup>e27</sup> and  
485 *mbl*<sup>MI00976</sup>/*mbl*<sup>MI04093</sup> (green).  
486 (H-N) *Mbl* transheterozygotes express *Dscam2.10A* in R cells. (H) *Dscam2.10B*  
487 control showing expression in the lamina plexus (angle brackets). (I) *Dscam2.10A*



488 control showing no expression of this isoform in R cells. (J-L) Heterozygous animals  
489 for *mb1* LOF alleles are comparable to control. (M-N) Two different *mb1*  
490 transheterozygote combinations exhibit de-repression of *Dscam2.10A* in R cells.  
491 (O) Quantification of *Dscam2.10>tdTom* expression in third instar R cells with  
492 various *mb1* manipulations; including RNAi knockdown (black bars) and whole  
493 animal transheterozygotes (white). Y-axis represents the number of optic lobes with R  
494 cells positive for tdTom over total quantified as a percentage. On the x-axis, the  
495 presence of a transgene is indicated with a grey box and the temperature at which the  
496 crosses were reared (25°C or 29°C) is indicated on the top.  
497 (P) *Dscam2* exon 10A inclusion is increased in *mb1* transheterozygotes. (Top)  
498 Semiquantitative RT-PCR from different genotypes indicated. Primers amplified the  
499 variable region that includes exon 10. A smaller product that would result from exon  
500 10 skipping is not observed. (Bottom) Exon 10A-specific cleavage with restriction  
501 enzyme ClaI shows an increase in exon 10A inclusion in *mb1* transheterozygotes.  
502 Percentage of exon 10A inclusion was calculated by dividing 10A by 10A+10B bands  
503 following restriction digest. The mean of exon 10A inclusion is shown at the bottom  
504 of each lane. ANOVA test with Tukey's multiple comparison test was used to  
505 compare the exon 10A inclusion. ns  $P > 0.05$ , \*\*  $P < 0.01$ . See also Figures S1 and  
506 S2.

507

508 **Figure 2.** *Drosophila mbl* is necessary for the selection of *Dscam2* exon 10B in R  
509 cells.

510 (A) Schematic of our predicted *mb1* MARCM results using *ey-FLP*. WT R cell clones  
511 will be GFP(+) and *Dscam2.10B>tdTom*(+) (yellow), whereas *mb1* mutant clones will  
512 be *Dscam2.10B>tdTom*(-) (green). (B<sub>1</sub>-B<sub>3</sub>) Control MARCM clones (green) in 3<sup>rd</sup>

513 instar R cells (angle brackets) are positive for *Dscam2.10B>tdTom* (arrowhead). (C<sub>1</sub>-  
514 C<sub>3</sub>) In *mbl<sup>e27</sup>* clones, *Dscam2.10B* labelling in the lamina plexus is discontinuous and  
515 its absence correlates with the loss of Mbl (arrowhead). (D<sub>1</sub>-D<sub>2</sub>) *Mbl* MARCM clones  
516 from midpupal optic lobes lack *Dscam2.10B>tdTom*. (E<sub>1</sub>-E<sub>3</sub>) A different allele  
517 (*mbl<sup>e127</sup>*) exhibits a similar phenotype in third instar brains.

518

519 **Figure 3.** *mbl* is expressed in a cell-specific manner that correlates with *Dscam2.10B*

520 (A) A *mbl-Gal4* reporter (green) is expressed in third instar R cells but not in lamina  
521 neuron precursor cells labelled with an antibody against Dacshund (DAC, red).

522 (B) Schematic of MultiColor FlpOut (MCFO) approach to characterize *mbl* reporter  
523 expression in lamina neurons at adult stages. The UAS FlpOut construct produces an  
524 epitope-tagged version of a non-fluorescent GFP (smGFP,(Nern et al., 2015))

525 (C<sub>1</sub>-C<sub>4</sub>) All lamina neurons can be detected using a MCFO strategy with a pan-  
526 neuronal reporter (*elav-Gal4*). Lamina neurons were identified based on their unique  
527 axon morphologies. (D<sub>1</sub>-D<sub>4</sub>) An intersectional strategy using *mbl-Gal4* labels

528 primarily L1 lamina neurons. (E) Quantification of lamina neurons and R7-R8  
529 neurons observed using the intersectional strategy. Dark green and light green boxes

530 represent high and low numbers of labelled neurons, respectively. (F-H) *Mbl* is not  
531 expressed in mushroom body (MB) neurons that express *Dscam2.10A* at 24hr apf.

532 (F<sub>1</sub>-F<sub>2</sub>) *Dscam2.10A* is expressed in  $\alpha'\beta'$  MB neurons that are not labelled by Fas2.

533 Fas2 labels the  $\alpha\beta$  and  $\gamma$  subsets of MB neurons. (G-H) Neither *Dscam2.10B* (G<sub>1</sub>-G<sub>2</sub>)  
534 nor *mbl* (H<sub>1</sub>-H<sub>2</sub>) are detected in MB neurons. See also Figures S3 and S4.

535

536 **Figure 4.** Multiple *mbl* isoforms promote selection of *Dscam2* exon 10B

537 (A) Schematic showing that *mb1* is sufficient to drive *Dscam2.10B* selection in  
538  $\alpha'\beta'$  neurons.  
539 (B) Control showing that *Dscam2.10A* (red) is expressed in  $\alpha'\beta'$  neurons at 24hr apf.  
540 (C) Control showing that *Dscam2.10B* is normally repressed in  $\alpha'\beta'$  neurons. (D)  
541 Overexpression of *mb1* activates *Dscam2.10B* selection (red) in  $\alpha'\beta'$  neurons. (E)  
542 Quantification of *Dscam2.10* expression in  $\alpha'\beta'$  neurons at 24-36hr apf with and  
543 without *mb1* OE. Control (No Gal4, grey bar), ubiquitous driver (*Act5c-Gal4*, black  
544 bars) and pan-mushroom body neuron driver (*OK107-Gal4*, white bars). Y-axis  
545 represents the number of tdTom positive (+)  $\alpha'\beta'$  over the total, expressed as a  
546 percentage. Ratio of tdTom(+)/total is shown in each bar. (F) *Mbl* OE increases  
547 *Dscam2* exon 10B inclusion. Semiquantitative RT-PCR as in Figure 1. Exon 10A-  
548 specific cleavage with restriction enzyme ClaI shows an increase in exon 10B  
549 inclusion in *mb1* OE animals, without exon 10 skipping. Percentage of exon 10B  
550 inclusion was calculated by dividing 10B by 10A+10B bands following  
551 electrophoresis and densitometry. The mean of exon 10B inclusion is shown at the  
552 bottom of each lane. ANOVA test with Tukey's multiple comparison test was used to  
553 compare the exon 10B inclusion. ns  $P > 0.05$ , \*\*  $P < 0.01$ , \*\*\*  $P < 0.001$ .

554

555 **Figure 5.** *Mbl* regulates *Dscam2* cell-type-specific alternative splicing in lamina  
556 neurons.

557 (A) Quantification of lamina neurons L1-L5 observed using the *Dscam2.10B-Gal4*  
558 (magenta) or *Dscam2.10A-Gal4* (blue) reporters with the intersectional strategy in  
559 *mb1* LOF animals. Green boxes represent high number of labelled neurons.  
560 *Dscam2.10A* is de-repressed in L1 neurons in a *mb1* LOF background  
561 (*mb1*<sup>M100976</sup>/*mb1*<sup>e27</sup>, hash tag).

562 (B) Schematic of *Dscam2.10A* de-repression in *mbl* LOF L1 neurons.

563 (C) Quantification of lamina neurons L1-L5 observed using the *Dscam2.10A-LexA*  
564 (blue) or *Dscam2.10B-LexA* (magenta) reporters with the intersectional strategy in  
565 animals with pan-neuronal (*elav-Gal4*) expression of *mbl*. Green boxes represent high  
566 numbers of labelled neurons. *Dscam2.10B-LexA* was aberrantly detected in L2, L3  
567 and L5 neurons overexpressing *mblB* (hash tag).

568 (D) Schematic of aberrant *Dscam2.10B* selection in L2, L3 and L5 neurons  
569 overexpressing *mbl*.

570 (E-K) L1 neurons in *mbl* LOF animals have reduced axon arbor area and dendritic  
571 array width when compared to controls. (E) A representative confocal image of a  
572 control L1 axon (green) with arbors at m1 and m5 layers. (F) A representative  
573 confocal image of an L1 axon from *mbl* LOF animals (*mbl<sup>MI00976</sup>/mbl<sup>e27</sup>*). (G) A  
574 representative confocal image of a control L1 dendritic array (grey). (H) A  
575 representative confocal image of a L1 dendritic array from *mbl* LOF animals  
576 (*mbl<sup>MI00976</sup>/mbl<sup>e27</sup>*). (I) Quantification of L1 axon m1 arbor area (mm<sup>2</sup>). (J)  
577 Quantification of L1 axon m5 arbor area (mm<sup>2</sup>). (K) Quantification of L1 dendritic  
578 width (mm). Tukey boxplot format: middle line = median, range bars = min and max,  
579 box = 25–75% quartiles, and each data point = single cartridge. Numbers in  
580 parentheses represent total number of L1 neurons quantified. Parametric t-test was  
581 used to compare *mbl* LOF L1 axon arbor area with controls. Non-parametric t-test  
582 was used to compare *mbl* LOF L1 dendritic width with controls. \*\*\*\*  $P < 0.0001$ .  
583 Bars, 5mm (E-H).

584

585

586

587 **References**

- 588 Artero, R., Prokop, A., Paricio, N., Begemann, G., Pueyo, I., Mlodzik, M., Perez-  
589 Alonso, M., and Baylies, M.K. (1998). The muscleblind gene participates in the  
590 organization of Z-bands and epidermal attachments of *Drosophila* muscles and is  
591 regulated by Dmef2. *Developmental biology* 195, 131-143.
- 592 Ashwal-Fluss, R., Meyer, M., Pamudurti, N.R., Ivanov, A., Bartok, O., Hanan, M.,  
593 Evantal, N., Memczak, S., Rajewsky, N., and Kadener, S. (2014). circRNA  
594 biogenesis competes with pre-mRNA splicing. *Molecular cell* 56, 55-66.
- 595 Bargiela, A., Llamusi, B., Cerro-Herreros, E., and Artero, R. (2014). Two enhancers  
596 control transcription of *Drosophila* muscleblind in the embryonic somatic  
597 musculature and in the central nervous system. *PloS one* 9, e93125.
- 598 Bausenwein, B., Dittrich, A.P., and Fischbach, K.F. (1992). The optic lobe of  
599 *Drosophila melanogaster*. II. Sorting of retinotopic pathways in the medulla. *Cell*  
600 and tissue research 267, 17-28.
- 601 Begemann, G., Paricio, N., Artero, R., Kiss, I., Perez-Alonso, M., and Mlodzik, M.  
602 (1997). muscleblind, a gene required for photoreceptor differentiation in  
603 *Drosophila*, encodes novel nuclear Cys3His-type zinc-finger-containing proteins.  
604 *Development* 124, 4321-4331.
- 605 Bell, T.J., Thaler, C., Castiglioni, A.J., Helton, T.D., and Lipscombe, D. (2004). Cell-  
606 specific alternative splicing increases calcium channel current density in the pain  
607 pathway. *Neuron* 41, 127-138.
- 608 Blanchette, M., Green, R.E., MacArthur, S., Brooks, A.N., Brenner, S.E., Eisen, M.B.,  
609 and Rio, D.C. (2009). Genome-wide analysis of alternative pre-mRNA splicing and  
610 RNA-binding specificities of the *Drosophila* hnRNP A/B family members.  
611 *Molecular cell* 33, 438-449.
- 612 Brand, A.H., and Perrimon, N. (1993). Targeted gene expression as a means of  
613 altering cell fates and generating dominant phenotypes. *Development* 118, 401-  
614 415.
- 615 Brouwer, J., Nagelkerke, D., den Heijer, P., Ruiter, J.H., Mulder, H., Begemann, M.J.,  
616 and Lie, K.I. (1997). Analysis of atrial sensed far-field ventricular signals: a  
617 reassessment. *Pacing and clinical electrophysiology : PACE* 20, 916-922.
- 618 Calarco, J.A., Superina, S., O'Hanlon, D., Gabut, M., Raj, B., Pan, Q., Skalska, U.,  
619 Clarke, L., Gelinas, D., van der Kooy, D., *et al.* (2009). Regulation of vertebrate  
620 nervous system alternative splicing and development by an SR-related protein.  
621 *Cell* 138, 898-910.
- 622 Chen, Y., Akin, O., Nern, A., Tsui, C.Y., Pecot, M.Y., and Zipursky, S.L. (2014). Cell-  
623 type-specific labeling of synapses in vivo through synaptic tagging with  
624 recombination. *Neuron* 81, 280-293.

- 625 Connolly, J.B., Roberts, I.J., Armstrong, J.D., Kaiser, K., Forte, M., Tully, T., and  
626 O'Kane, C.J. (1996). Associative learning disrupted by impaired Gs signaling in  
627 *Drosophila* mushroom bodies. *Science* 274, 2104-2107.
- 628 Cook, R.K., Christensen, S.J., Deal, J.A., Coburn, R.A., Deal, M.E., Gresens, J.M.,  
629 Kaufman, T.C., and Cook, K.R. (2012). The generation of chromosomal deletions  
630 to provide extensive coverage and subdivision of the *Drosophila melanogaster*  
631 genome. *Genome biology* 13, R21.
- 632 Diao, F., Ironfield, H., Luan, H., Diao, F., Shropshire, W.C., Ewer, J., Marr, E., Potter,  
633 C.J., Landgraf, M., and White, B.H. (2015). Plug-and-play genetic access to  
634 *drosophila* cell types using exchangeable exon cassettes. *Cell reports* 10, 1410-  
635 1421.
- 636 Dietzl, G., Chen, D., Schnorrer, F., Su, K.C., Barinova, Y., Fellner, M., Gasser, B.,  
637 Kinsey, K., Oppel, S., Scheiblauer, S., *et al.* (2007). A genome-wide transgenic  
638 RNAi library for conditional gene inactivation in *Drosophila*. *Nature* 448, 151-  
639 U151.
- 640 Fischbach, K.F., and Dittrich, A.P.M. (1989). The Optic Lobe of *Drosophila*-  
641 *Melanogaster* .1. A Golgi Analysis of Wild-Type Structure. *Cell and tissue research*  
642 258, 441-475.
- 643 Funada, M., Hara, H., Sasagawa, H., Kitagawa, Y., and Kadowaki, T. (2007). A  
644 honey bee Dscam family member, AbsCAM, is a brain-specific cell adhesion  
645 molecule with the neurite outgrowth activity which influences neuronal wiring  
646 during development. *The European journal of neuroscience* 25, 168-180.
- 647 Hayashi, S., Ito, K., Sado, Y., Taniguchi, M., Akimoto, A., Takeuchi, H., Aigaki, T.,  
648 Matsuzaki, F., Nakagoshi, H., Tanimura, T., *et al.* (2002). GETDB, a database  
649 compiling expression patterns and molecular locations of a collection of Gal4  
650 enhancer traps. *Genesis* 34, 58-61.
- 651 Houseley, J.M., Garcia-Casado, Z., Pascual, M., Paricio, N., O'Dell, K.M., Monckton,  
652 D.G., and Artero, R.D. (2006). Noncanonical RNAs from transcripts of the  
653 *Drosophila* muscleblind gene. *The Journal of heredity* 97, 253-260.
- 654 Huang, H., Wahlin, K.J., McNally, M., Irving, N.D., and Adler, R. (2008).  
655 Developmental regulation of muscleblind-like (MBNL) gene expression in the  
656 chicken embryo retina. *Developmental dynamics : an official publication of the*  
657 *American Association of Anatomists* 237, 286-296.
- 658 Iijima, T., Iijima, Y., Witte, H., and Scheiffele, P. (2014). Neuronal cell type-specific  
659 alternative splicing is regulated by the KH domain protein SLM1. *The Journal of*  
660 *cell biology* 204, 331-342.
- 661 Irion, U. (2012). *Drosophila* muscleblind codes for proteins with one and two  
662 tandem zinc finger motifs. *PloS one* 7, e34248.

- 663 Juni, N., and Yamamoto, D. (2009). Genetic analysis of chaste, a new mutation of  
664 *Drosophila melanogaster* characterized by extremely low female sexual  
665 receptivity. *Journal of neurogenetics* 23, 329-340.
- 666 Kania, A., Salzberg, A., Bhat, M., D'Evelyn, D., He, Y., Kiss, I., and Bellen, H.J. (1995).  
667 P-element mutations affecting embryonic peripheral nervous system  
668 development in *Drosophila melanogaster*. *Genetics* 139, 1663-1678.
- 669 Kerwin, S.K., Li, J.S.S., Noakes, P.G., Shin, G.J., and Millard, S.S. (2018). Regulated  
670 Alternative Splicing of *Drosophila Dscam2* Is Necessary for Attaining the  
671 Appropriate Number of Photoreceptor Synapses. *Genetics* 208, 717-728.
- 672 Kino, Y., Mori, D., Oma, Y., Takeshita, Y., Sasagawa, N., and Ishiura, S. (2004).  
673 Muscleblind protein, MBNL1/EXP, binds specifically to CHHG repeats. *Human*  
674 *molecular genetics* 13, 495-507.
- 675 Kuroyanagi, H., Kobayashi, T., Mitani, S., and Hagiwara, M. (2006). Transgenic  
676 alternative-splicing reporters reveal tissue-specific expression profiles and  
677 regulation mechanisms in vivo. *Nature methods* 3, 909-915.
- 678 Lah, G.J., Li, J.S., and Millard, S.S. (2014). Cell-specific alternative splicing of  
679 *Drosophila Dscam2* is crucial for proper neuronal wiring. *Neuron* 83, 1376-1388.
- 680 Lai, S.L., and Lee, T. (2006). Genetic mosaic with dual binary transcriptional  
681 systems in *Drosophila*. *Nature neuroscience* 9, 703-709.
- 682 Lee, T., and Luo, L. (1999). Mosaic analysis with a repressible cell marker for  
683 studies of gene function in neuronal morphogenesis. *Neuron* 22, 451-461.
- 684 Li, J.S., Shin, G.J., and Millard, S.S. (2015). Neuronal cell-type-specific alternative  
685 splicing: A mechanism for specifying connections in the brain? *Neurogenesis* 2,  
686 e1122699.
- 687 Li, L.B., Yu, Z., Teng, X., and Bonini, N.M. (2008). RNA toxicity is a component of  
688 ataxin-3 degeneration in *Drosophila*. *Nature* 453, 1107-1111.
- 689 Llamusi, B., Bargiela, A., Fernandez-Costa, J.M., Garcia-Lopez, A., Klima, R.,  
690 Feiguin, F., and Artero, R. (2013). Muscleblind, BSF and TBPH are mislocalized in  
691 the muscle sarcomere of a *Drosophila* myotonic dystrophy model. *Disease*  
692 *models & mechanisms* 6, 184-196.
- 693 Machuca-Tzili, L.E., Buxton, S., Thorpe, A., Timson, C.M., Wigmore, P., Luther, P.K.,  
694 and Brook, J.D. (2011). Zebrafish deficient for Muscleblind-like 2 exhibit features  
695 of myotonic dystrophy. *Disease models & mechanisms* 4, 381-392.
- 696 Markovtsov, V., Nikolic, J.M., Goldman, J.A., Turck, C.W., Chou, M.Y., and Black, D.L.  
697 (2000). Cooperative assembly of an hnRNP complex induced by a tissue-specific  
698 homolog of polypyrimidine tract binding protein. *Molecular and cellular biology*  
699 20, 7463-7479.



- 700 McKee, A.E., Minet, E., Stern, C., Riahi, S., Stiles, C.D., and Silver, P.A. (2005). A  
701 genome-wide in situ hybridization map of RNA-binding proteins reveals  
702 anatomically restricted expression in the developing mouse brain. *BMC*  
703 *developmental biology* 5, 14.
- 704 Millard, S.S., Flanagan, J.J., Pappu, K.S., Wu, W., and Zipursky, S.L. (2007). *Dscam2*  
705 mediates axonal tiling in the *Drosophila* visual system. *Nature* 447, 720-724.
- 706 Millard, S.S., Lu, Z., Zipursky, S.L., and Meinertzhagen, I.A. (2010). *Drosophila*  
707 *dscam* proteins regulate postsynaptic specificity at multiple-contact synapses.  
708 *Neuron* 67, 761-768.
- 709 Mondal, K., VijayRaghavan, K., and Varadarajan, R. (2007). Design and utility of  
710 temperature-sensitive Gal4 mutants for conditional gene expression in  
711 *Drosophila*. *Fly* 1, 282-286.
- 712 Nern, A., Pfeiffer, B.D., and Rubin, G.M. (2015). Optimized tools for multicolor  
713 stochastic labeling reveal diverse stereotyped cell arrangements in the fly visual  
714 system. *Proceedings of the National Academy of Sciences of the United States of*  
715 *America* 112, E2967-E2976.
- 716 Newsome, T.P., Schmidt, S., Dietzl, G., Keleman, K., Asling, B., Debant, A., and  
717 Dickson, B.J. (2000). Trio combines with dock to regulate Pak activity during  
718 photoreceptor axon pathfinding in *Drosophila*. *Cell* 101, 283-294.
- 719 Ni, J.Q., Markstein, M., Binari, R., Pfeiffer, B., Liu, L.P., Villalta, C., Booker, M.,  
720 Perkins, L., and Perrimon, N. (2008). Vector and parameters for targeted  
721 transgenic RNA interference in *Drosophila melanogaster*. *Nature methods* 5, 49-  
722 51.
- 723 Nilsen, T.W., and Graveley, B.R. (2010). Expansion of the eukaryotic proteome by  
724 alternative splicing. *Nature* 463, 457-463.
- 725 Norris, A.D., Gao, S., Norris, M.L., Ray, D., Ramani, A.K., Fraser, A.G., Morris, Q.,  
726 Hughes, T.R., Zhen, M., and Calarco, J.A. (2014). A pair of RNA-binding proteins  
727 controls networks of splicing events contributing to specialization of neural cell  
728 types. *Molecular cell* 54, 946-959.
- 729 Norris, A.D., Gracida, X., and Calarco, J.A. (2017). CRISPR-mediated genetic  
730 interaction profiling identifies RNA binding proteins controlling metazoan  
731 fitness. *eLife* 6.
- 732 Ohno, G., Hagiwara, M., and Kuroyanagi, H. (2008). STAR family RNA-binding  
733 protein ASD-2 regulates developmental switching of mutually exclusive  
734 alternative splicing in vivo. *Genes & development* 22, 360-374.
- 735 Pan, Q., Shai, O., Lee, L.J., Frey, B.J., and Blencowe, B.J. (2008). Deep surveying of  
736 alternative splicing complexity in the human transcriptome by high-throughput  
737 sequencing. *Nature genetics* 40, 1413-1415.



- 738 Parks, A.L., Cook, K.R., Belvin, M., Dompe, N.A., Fawcett, R., Huppert, K., Tan, L.R.,  
739 Winter, C.G., Bogart, K.P., Deal, J.E., *et al.* (2004). Systematic generation of high-  
740 resolution deletion coverage of the *Drosophila melanogaster* genome. *Nature*  
741 *genetics* 36, 288-292.
- 742 Pascual, M., Vicente, M., Monferrer, L., and Artero, R. (2006). The Muscleblind  
743 family of proteins: an emerging class of regulators of developmentally  
744 programmed alternative splicing. *Differentiation; research in biological diversity*  
745 74, 65-80.
- 746 Schreiner, D., Nguyen, T.M., Russo, G., Heber, S., Patrignani, A., Ahrne, E., and  
747 Scheiffele, P. (2014). Targeted combinatorial alternative splicing generates brain  
748 region-specific repertoires of neurexins. *Neuron* 84, 386-398.
- 749 Spradling, A.C., Stern, D., Beaton, A., Rhem, E.J., Lavery, T., Mozden, N., Misra, S.,  
750 and Rubin, G.M. (1999). The Berkeley *Drosophila* Genome Project gene  
751 disruption project: Single P-element insertions mutating 25% of vital *Drosophila*  
752 genes. *Genetics* 153, 135-177.
- 753 Tadros, W., Xu, S.W., Akin, O., Yi, C.H., Shin, G.J.E., Millard, S.S., and Zipursky, S.L.  
754 (2016). Dscam Proteins Direct Dendritic Targeting through Adhesion. *Neuron*  
755 89, 480-493.
- 756 Tan, L., Zhang, K.X., Pecot, M.Y., Nagarkar-Jaiswal, S., Lee, P.T., Takemura, S.Y.,  
757 McEwen, J.M., Nern, A., Xu, S., Tadros, W., *et al.* (2015). Ig Superfamily Ligand and  
758 Receptor Pairs Expressed in Synaptic Partners in *Drosophila*. *Cell* 163, 1756-  
759 1769.
- 760 Tomioka, M., Naito, Y., Kuroyanagi, H., and Iino, Y. (2016). Splicing factors control  
761 *C. elegans* behavioural learning in a single neuron by producing DAF-2c receptor.  
762 *Nature communications* 7, 11645.
- 763 Underwood, J.G., Boutz, P.L., Dougherty, J.D., Stoilov, P., and Black, D.L. (2005).  
764 Homologues of the *Caenorhabditis elegans* Fox-1 protein are neuronal splicing  
765 regulators in mammals. *Molecular and cellular biology* 25, 10005-10016.
- 766 Venken, K.J., Schulze, K.L., Haelterman, N.A., Pan, H., He, Y., Evans-Holm, M.,  
767 Carlson, J.W., Levis, R.W., Spradling, A.C., Hoskins, R.A., and Bellen, H.J. (2011).  
768 MiMIC: a highly versatile transposon insertion resource for engineering  
769 *Drosophila melanogaster* genes. *Nature methods* 8, 737-743.
- 770 Vicente, M., Monferrer, L., Poulos, M.G., Houseley, J., Monckton, D.G., O'Dell K, M.,  
771 Swanson, M.S., and Artero, R.D. (2007). Muscleblind isoforms are functionally  
772 distinct and regulate alpha-actinin splicing. *Differentiation; research in biological*  
773 *diversity* 75, 427-440.
- 774 Wang, E.T., Sandberg, R., Luo, S., Khrebtukova, I., Zhang, L., Mayr, C., Kingsmore,  
775 S.F., Schroth, G.P., and Burge, C.B. (2008). Alternative isoform regulation in  
776 human tissue transcriptomes. *Nature* 456, 470-476.

- 777 Wang, Q., Abruzzi, K.C., Rosbash, M., and Rio, D.C. (2018). Striking circadian  
778 neuron diversity and cycling of *Drosophila* alternative splicing. *eLife* 7.
- 779 Warzecha, C.C., Sato, T.K., Nabet, B., Hogenesch, J.B., and Carstens, R.P. (2009).  
780 ESRP1 and ESRP2 are epithelial cell-type-specific regulators of FGFR2 splicing.  
781 *Molecular cell* 33, 591-601.
- 782 Xu, T., and Rubin, G.M. (1993). Analysis of genetic mosaics in developing and  
783 adult *Drosophila* tissues. *Development* 117, 1223-1237.  
784

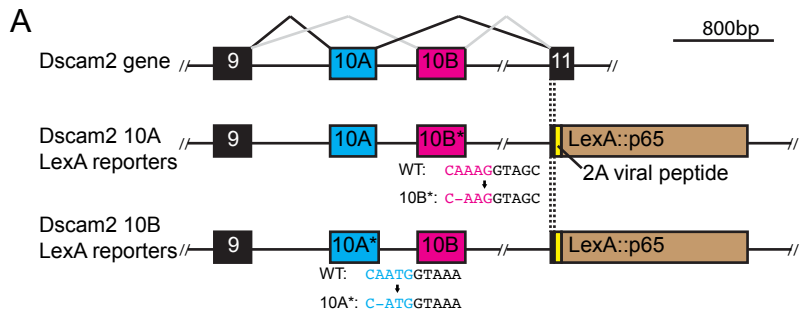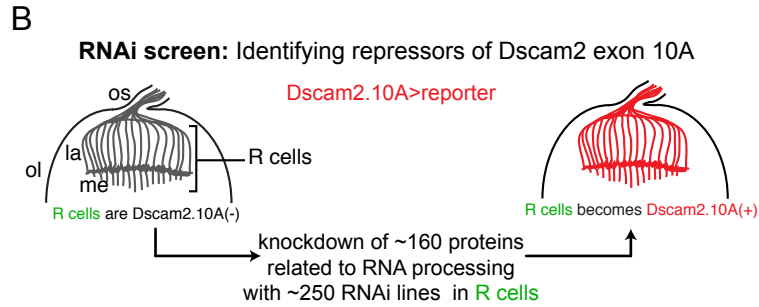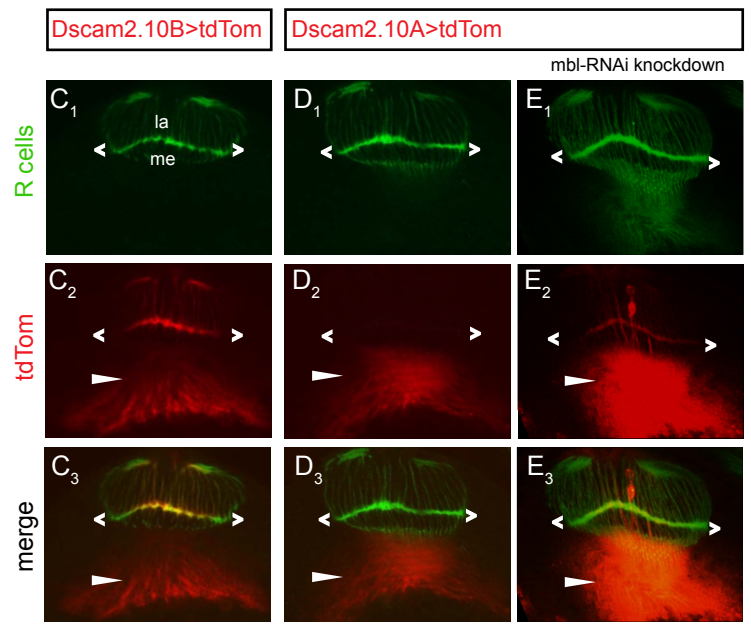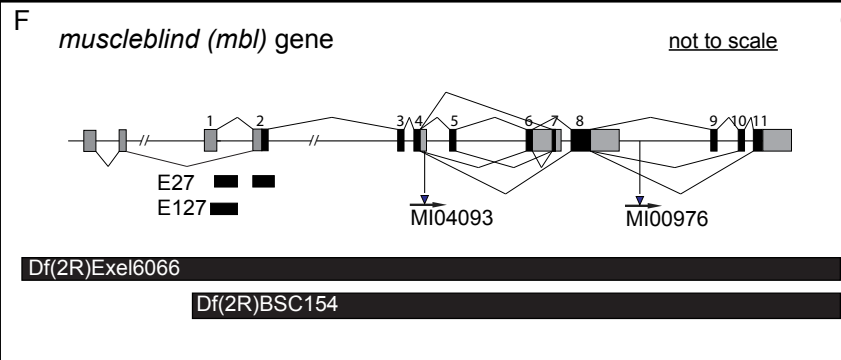

**G**

**Complementation test: mbi alleles**

|                               |                                |                                  |                                  |                         |                           |                                         |
|-------------------------------|--------------------------------|----------------------------------|----------------------------------|-------------------------|---------------------------|-----------------------------------------|
| <i>mbi<sup>le27</sup>/CyO</i> | <i>mbi<sup>le127</sup>/CyO</i> | <i>mbi<sup>MI00976</sup>/CyO</i> | <i>mbi<sup>MI04093</sup>/CyO</i> | <i>Df(2R)BSC154/CyO</i> | <i>Df(2R)Exel6066/CyO</i> |                                         |
| 0/256                         | 0/20                           | 0/39                             | 1/285                            | 0/224                   | 0/26                      | <i>mbi<sup>le27</sup>/CyO</i>           |
|                               | 0/118                          | 47/246                           | 0/64                             | 0/309                   | 0/223                     | <i>mbi<sup>le127</sup>/CyO</i>          |
|                               |                                | 0/271                            | 24/173                           | 8/334                   | 4/116                     | <i>mbi<sup>MI00976</sup>/CyO</i>        |
|                               |                                |                                  | 1/313                            | 0/313                   | 0/135                     | <i>mbi<sup>MI04093</sup>/CyO</i>        |
|                               |                                |                                  |                                  | 0/226                   | 0/92                      | <i>Df(2R)BSC154/CyO</i>                 |
|                               |                                |                                  |                                  |                         | 0/110                     | <i>Df(2R)Exel6066/CyO</i>               |
|                               |                                |                                  |                                  |                         |                           | no of non-CyO offspring total offspring |

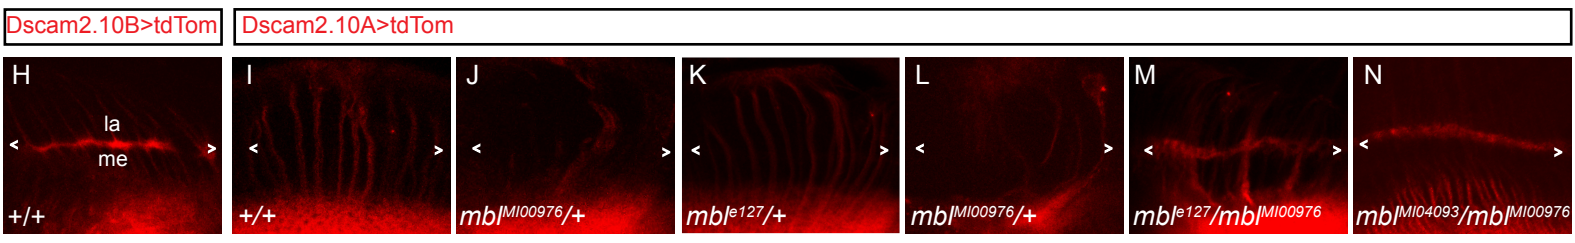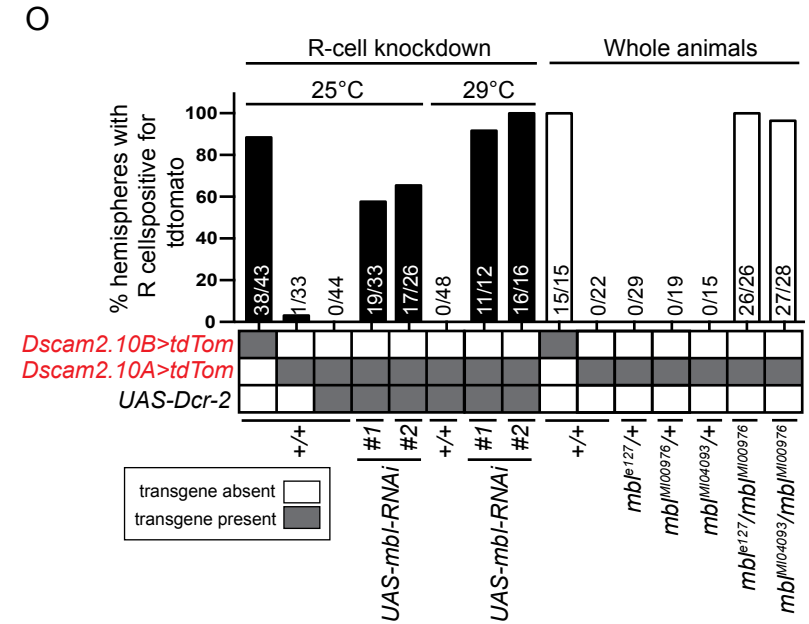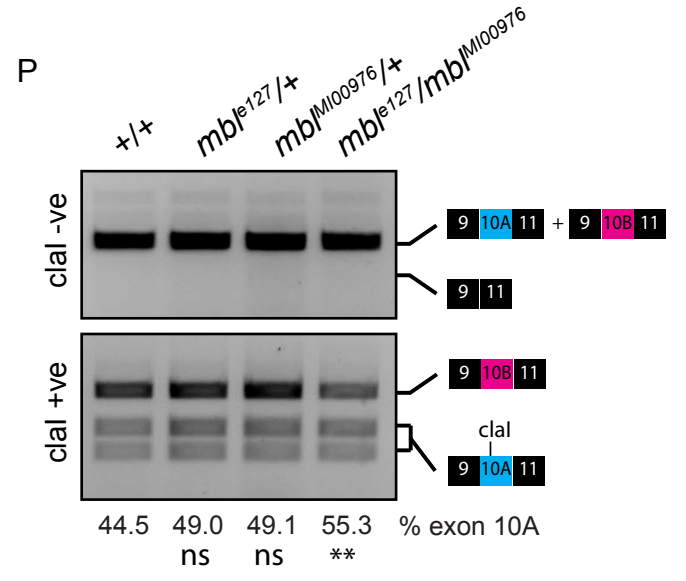

A

ey-FLP MARCM: Mitotic recombination generates clones of *mb1* LOF R cell

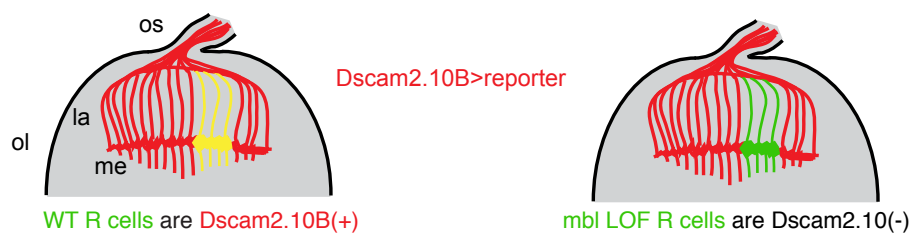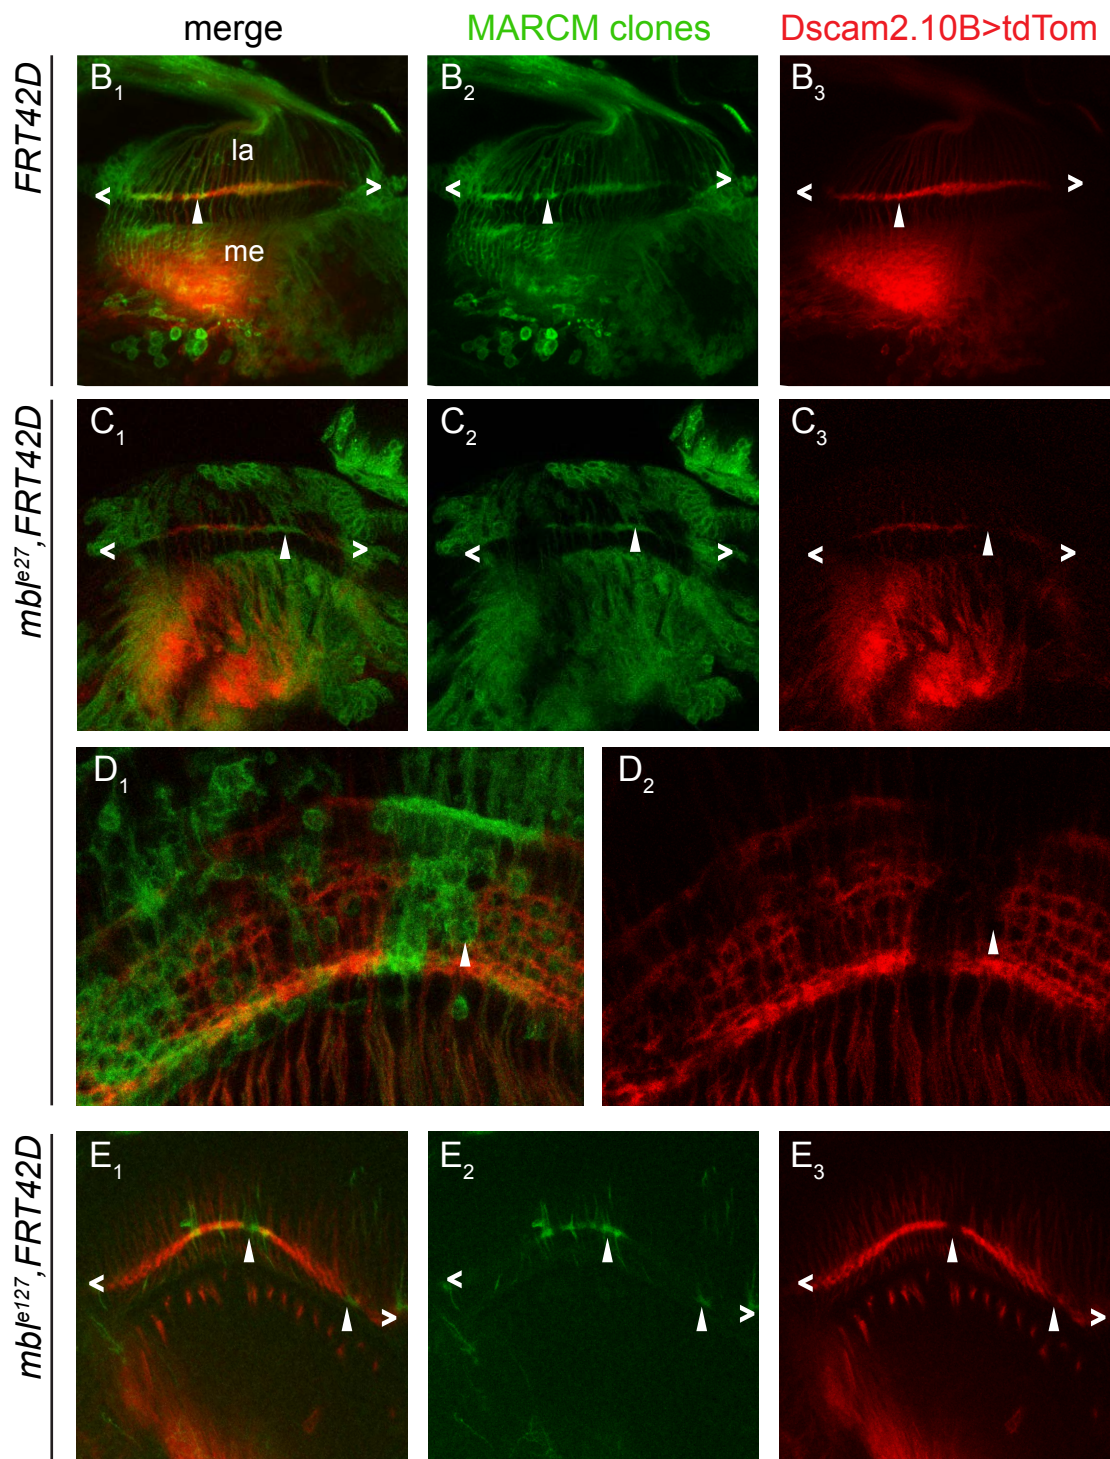



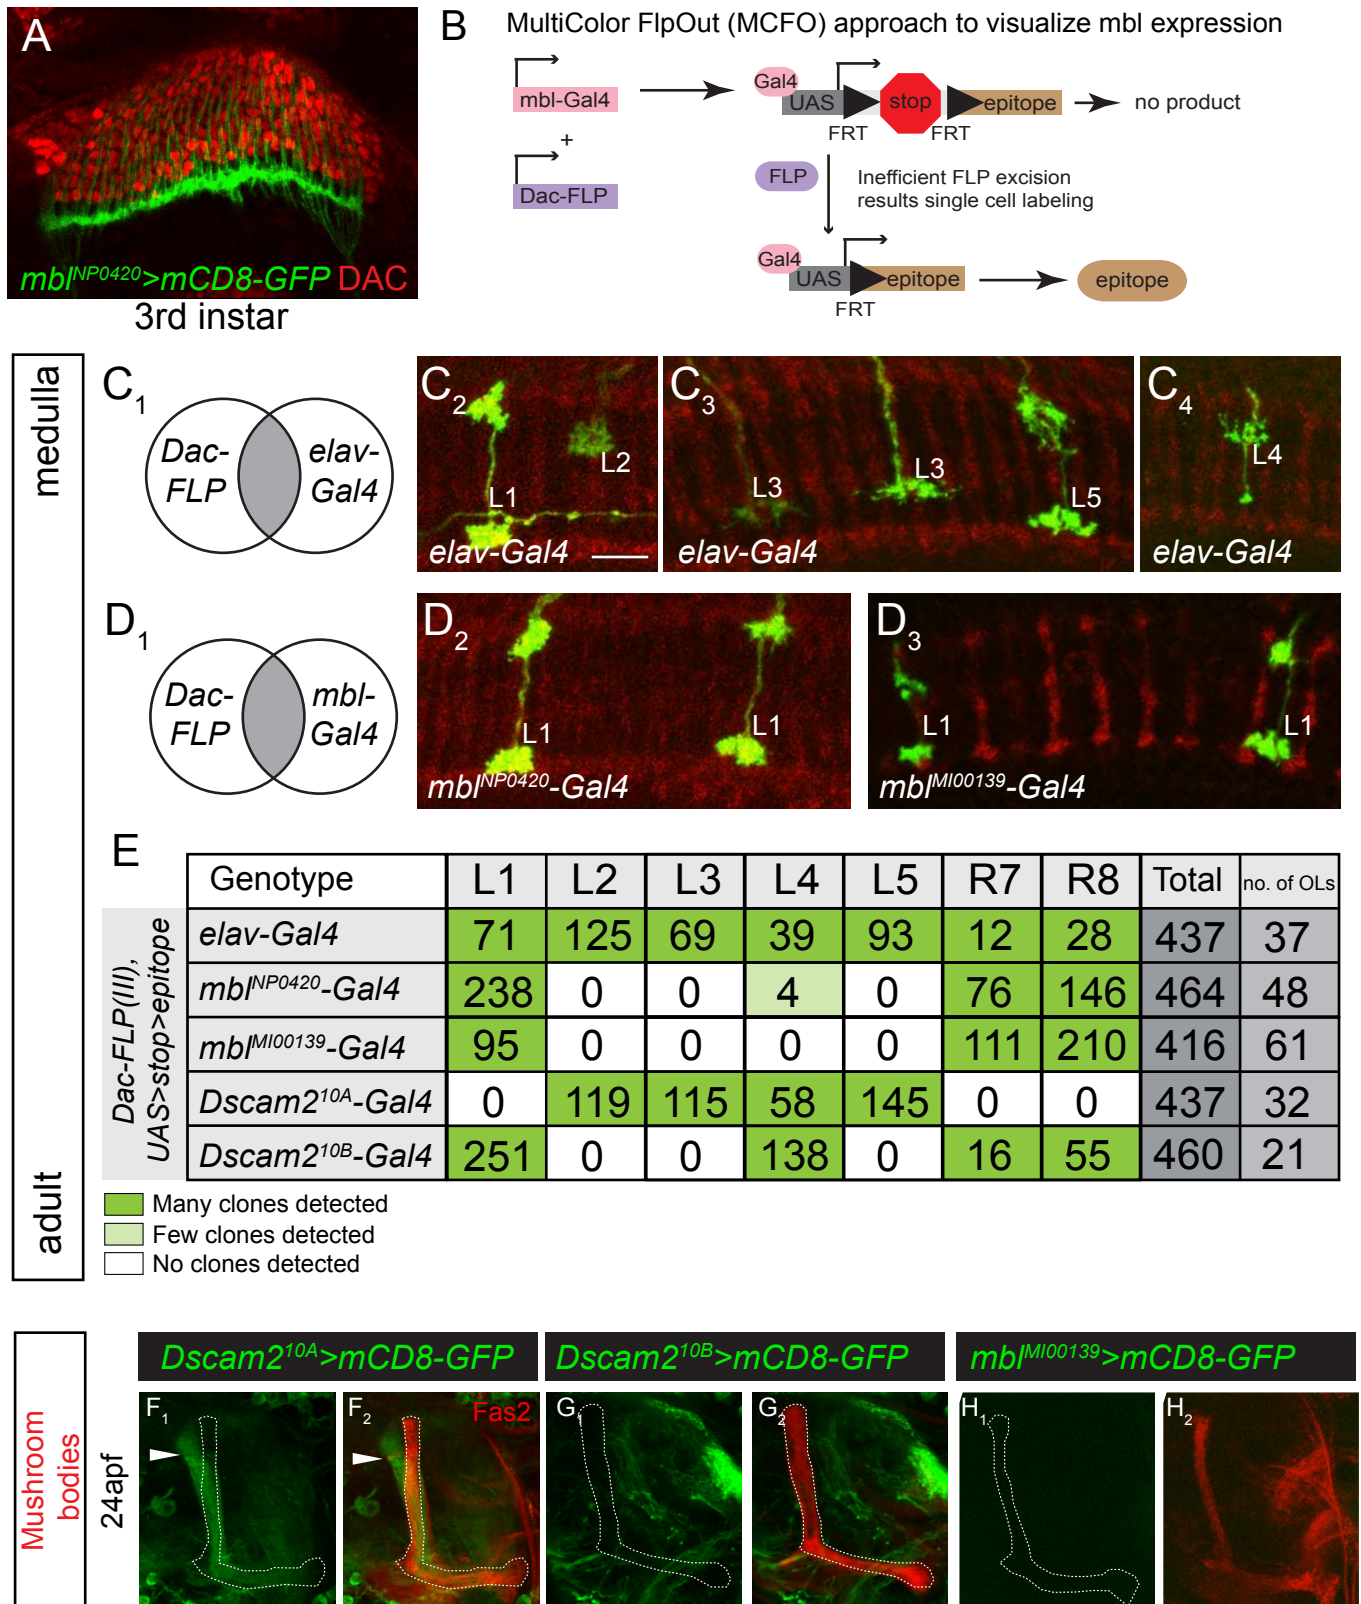

A

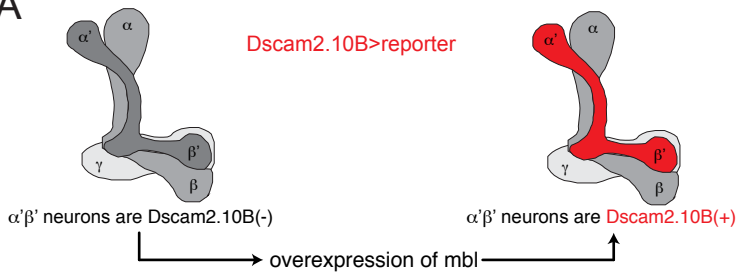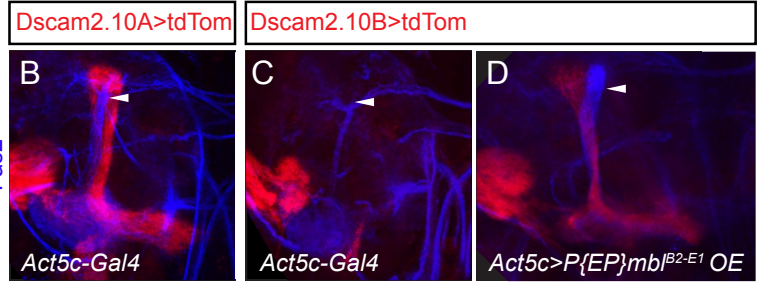

E

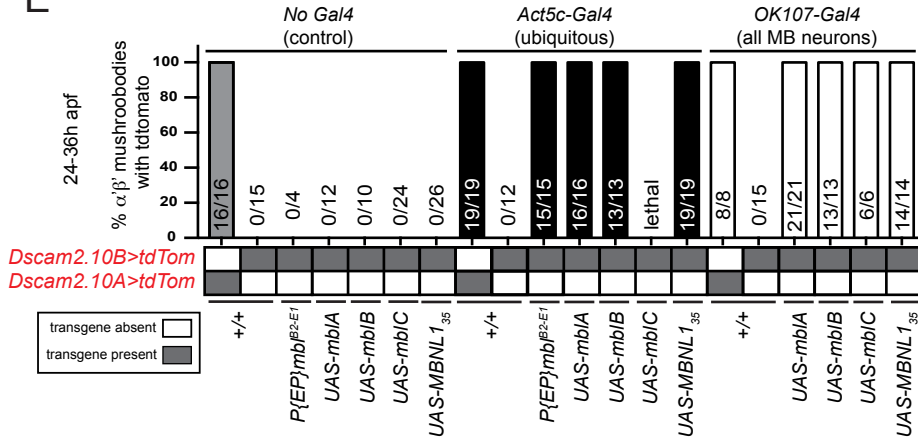

F

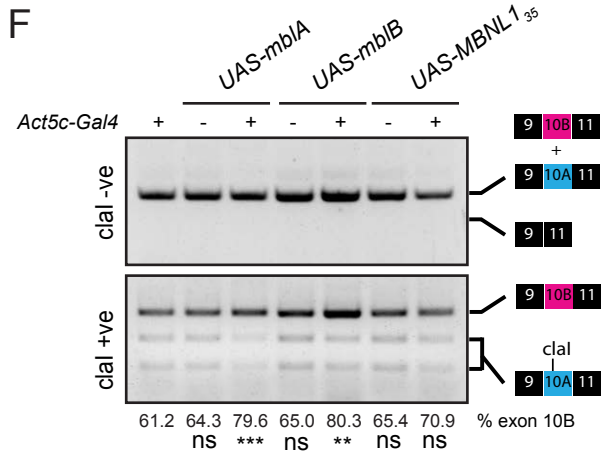

**Figure 5.**

*mb1* loss-of-function (LOF)

**A**

| Genotype                                         |                                      | L1                             | L2  | L3  | L4  | L5  | Total | no. of OLS |    |
|--------------------------------------------------|--------------------------------------|--------------------------------|-----|-----|-----|-----|-------|------------|----|
| 27G05-FLP(X),<br>UAS>stop>epitope                | <i>Dscam2<sup>10B</sup>-Gal4</i> +/+ | 359                            | 0   | 0   | 118 | 0   | 477   | 11         |    |
|                                                  | <i>Dscam2<sup>10A</sup>-Gal4</i>     | +/+                            | 0   | 94  | 105 | 58  | 146   | 403        | 10 |
|                                                  |                                      | <i>mb1<sup>le127</sup>/+</i>   | 1   | 96  | 99  | 117 | 147   | 460        | 10 |
|                                                  |                                      | <i>mb1<sup>M100976</sup>/+</i> | 1   | 102 | 114 | 111 | 155   | 483        | 11 |
| <i>mb1<sup>le127</sup>/mb1<sup>M100976</sup></i> | 45 <sup>#</sup>                      | 82                             | 105 | 120 | 141 | 493 | 10    |            |    |

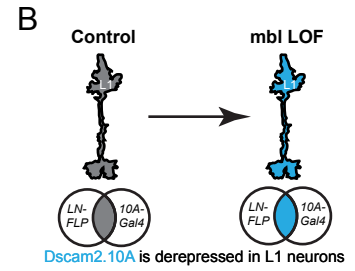

*mb1* overexpression (OE)

**C**

| Genotype                             |                                                   | L1                        | L2  | L3              | L4              | L5 | Total           | no. of OLS |    |
|--------------------------------------|---------------------------------------------------|---------------------------|-----|-----------------|-----------------|----|-----------------|------------|----|
| 27G05-FLP(X),<br>LexAop>stop>epitope | <i>Dscam2<sup>10A</sup>-LexA</i> <i>elav-Gal4</i> | 0                         | 57  | 63              | 12              | 89 | 221             | 18         |    |
|                                      | <i>Dscam2<sup>10B</sup>-LexA</i>                  | <i>elav-Gal4</i>          | 117 | 0               | 0               | 70 | 0               | 187        | 20 |
|                                      |                                                   | <i>elav-Gal4+UAS-mb1B</i> | 77  | 65 <sup>#</sup> | 31 <sup>#</sup> | 29 | 28 <sup>#</sup> | 230        | 22 |

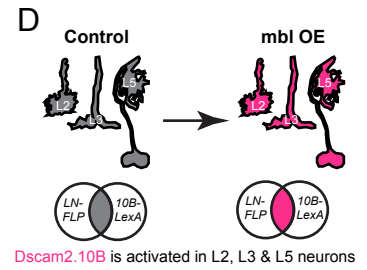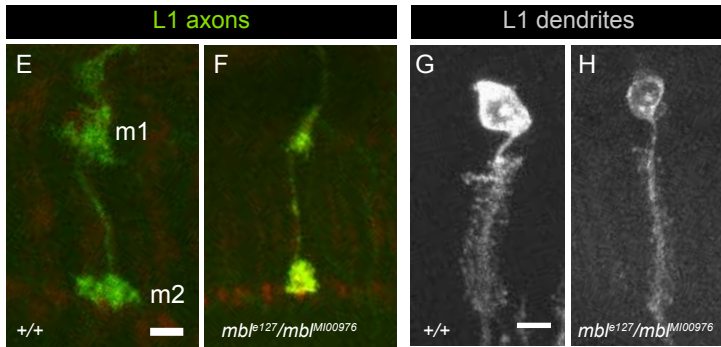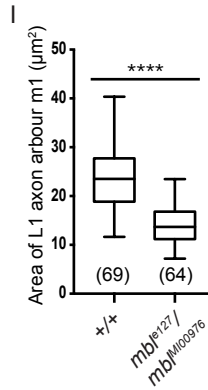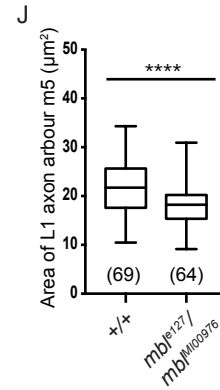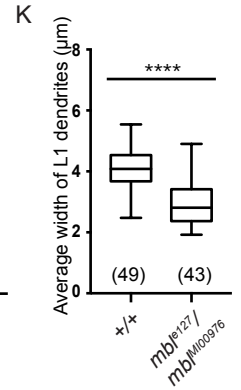

## Fly genotypes

### R cell RNAi experiments (Figure 1)

1. *w; GMR-GFP, GMR-Gal4/CyO; Dscam2.10B-LexA, LexAop-myr-tdTomato/TM6B*
2. *w; GMR-GFP, GMR-Gal4/CyO; Dscam2.10A-LexA, LexAop-myr-tdTomato/TM6B*
3. *w, UAS-Dcr-2; GMR-GFP, GMR-Gal4/CyO; Dscam2.10A-LexA, LexAop-myr-tdTomato/TM6B*
4. *w, UAS-Dcr-2; GMR-GFP, GMR-Gal4/UAS-mCD8-RFP; Dscam2.10A-LexA, LexAop-myr-tdTomato/+*
5. *w, UAS-Dcr-2; GMR-GFP, GMR-Gal4/UAS-mbl-RNAi(v28732); Dscam2.10A-LexA, LexAop-myr-tdTomato/+*
6. *w, UAS-Dcr-2; GMR-GFP, GMR-Gal4/+; Dscam2.10A-LexA, LexAop-myr-tdTomato/UAS-mbl-RNAi(TRiP.JF03264)*

### mbl whole animal experiments (Figure 1)

1. *w; +; Dscam2.10B-LexA, LexAop-myr-tdTomato/TM6B*
2. *w; +; Dscam2.10A-LexA, LexAop-myr-tdTomato/TM6B*
3. *w; mbl<sup>e127</sup>/CyO,GFP; Dscam2.10A-LexA, LexAop-myr-tdTomato/TM6B*
4. *w; mbl<sup>M100976</sup>/CyO,GFP; Dscam2.10A-LexA, LexAop-myr-tdTomato/TM6B*
5. *w; mbl<sup>M104093</sup>/CyO,GFP; Dscam2.10A-LexA, LexAop-myr-tdTomato/TM6B*
6. *w; mbl<sup>e127</sup>/ mbl<sup>M100976</sup>; Dscam2.10A-LexA, LexAop-myr-tdTomato/+*
7. *w; mbl<sup>M104093</sup>/ mbl<sup>M100976</sup>; Dscam2.10A-LexA, LexAop-myr-tdTomato/+*

### mbl ey-FLP MARCM experiments (Figure 2)

1. *w, ey-FLP; FRT42D, Tub-Gal80/FRT42D; Dscam2.10A-LexA, LexAop-myr-tdTomato, Act5c-Gal4, UAS-mCD8-GFP/+*



2. *w, ey-FLP; FRT42D, Tub-Gal80/FRT42D, mbl<sup>e27</sup>; Dscam2.10A-LexA, LexAop-myr-tdTomato, Act5c-Gal4, UAS-mCD8-GFP/+*

3. *w, ey-FLP; FRT42D, Tub-Gal80/FRT42D, mbl<sup>e127</sup>; Dscam2.10A-LexA, LexAop-myr-tdTomato, Act5c-Gal4, UAS-mCD8-GFP/+*

### mb1 expression experiments (Figure 3)

1. *w; UAS-mCD8-GFP/+; mbl<sup>NP0420</sup>-Gal4/+*

2. *w; UAS-mCD8-GFP/+; mbl<sup>MI00139</sup>-Gal4/+*

3. *w; Dac-FLP/+; elav-Gal4/ UAS>stop>myr::smGdP-V5-THS-*

*UAS>stop>myr::smGdP-cMyc*

4. *w; Dac-FLP/+; mbl<sup>NP0420</sup>-Gal4/ UAS>stop>myr::smGdP-V5-THS-*

*UAS>stop>myr::smGdP-cMyc*

5. *w; Dac-FLP/+; mbl<sup>MI00139</sup>-Gal4/ UAS>stop>myr::smGdP-V5-THS-*

*UAS>stop>myr::smGdP-cMyc*

6. *w; Dac-FLP/+; Dscam2.10A-Gal4/ UAS>stop>myr::smGdP-V5-THS-*

*UAS>stop>myr::smGdP-cMyc*

7. *w; Dac-FLP/+; Dscam2.10B-Gal4/ UAS>stop>myr::smGdP-V5-THS-*

*UAS>stop>myr::smGdP-cMyc*

8. *w; +; mbl<sup>NP0420</sup>-Gal4/UAS-GFP.nls*

9. *w; +; mbl<sup>MI00139</sup>-Gal4/UAS-GFP.nls*

### mb1 ectopic expression in MBs (Figure 4)

1. *w; +; Dscam2.10A-LexA, LexAop-myr-tdTomato, Act5c-Gal4, UAS-mCD8-GFP/+*

2. *w; +; Dscam2.10B-LexA, LexAop-myr-tdTomato, Act5c-Gal4, UAS-mCD8-GFP/+*

3. *w; P{EP}mbl<sup>B2-E1</sup>/+; Dscam2.10B-LexA, LexAop-myr-tdTomato, Act5c-Gal4, UAS-mCD8-GFP/+*

4. *w; +; Dscam2.10B-LexA, LexAop-myr-tdTomato, Act5c-Gal4, UAS-mCD8-GFP/UAS-mblA*

5. *w; +; Dscam2.10B-LexA, LexAop-myr-tdTomato, Act5c-Gal4, UAS-mCD8-GFP/UAS-mblB*

6. *w; +; Dscam2.10B-LexA, LexAop-myr-tdTomato, Act5c-Gal4, UAS-mCD8-GFP/UAS-mblC*

7. *w; +; Dscam2.10B-LexA, LexAop-myr-tdTomato, Act5c-Gal4, UAS-mCD8-GFP/UAS-MBNL1<sub>35</sub>*

8. *w; +; Dscam2.10B-LexA, LexAop-myr-tdTomato, UAS-mCD8-GFP/UAS-mblA; OK107-Gal4/+*

9. *w; +; Dscam2.10B-LexA, LexAop-myr-tdTomato, UAS-mCD8-GFP/UAS-mblB; OK107-Gal4/+*

10. *w; +; Dscam2.10B-LexA, LexAop-myr-tdTomato, UAS-mCD8-GFP/UAS-mblC; OK107-Gal4/+*

11. *w; +; Dscam2.10B-LexA, LexAop-myr-tdTomato, UAS-mCD8-GFP/UAS-MBNL1<sub>35</sub>; OK107-Gal4/+*

#### Lamin neuron FlpOut mbl LOF (Figure 5)

1. *w, 27G05-FLP/(+ or Y); Bl/CyO; Dscam2.10B-Gal4/ UAS>stop>myr::smGdP-V5-THS-UAS>stop>myr::smGdP-cMyc*

2. *w, 27G05-FLP/(+ or Y); Bl/CyO; Dscam2.10A-Gal4/ UAS>stop>myr::smGdP-V5-THS-UAS>stop>myr::smGdP-cMyc*

3. *w, 27G05-FLP/(+ or Y); mbl<sup>e127</sup>/CyO; Dscam2.10A-Gal4/*

*UAS>stop>myr::smGdP-V5-THS-UAS>stop>myr::smGdP-cMyc*

4. *w, 27G05-FLP/(+ or Y); mbl<sup>M100976</sup>/CyO; Dscam2.10A-Gal4/*

*UAS>stop>myr::smGdP-V5-THS-UAS>stop>myr::smGdP-cMyc*

5. *w, 27G05-FLP/(+ or Y); mbl<sup>e127</sup>/ mbl<sup>M100976</sup>; Dscam2.10A-Gal4/*

*UAS>stop>myr::smGdP-V5-THS-UAS>stop>myr::smGdP-cMyc.*

6. *w, 27G05-FLP/(+ or Y); elav-Gal4/LexAop2>stop>myr::smGdP-V5;*

*Dscam2.10A-LexA/TM2.*

7. *w, 27G05-FLP/(+ or Y); elav-Gal4/LexAop2>stop>myr::smGdP-V5;*

*Dscam2.10B-LexA/TM2.*

8. *w, 27G05-FLP/(+ or Y); elav-Gal4/LexAop2>stop>myr::smGdP-V5;*

*Dscam2.10B-LexA/UAS-mblB.*

#### L1 axonal and dendritic defects (Figure 5)

1. *w, 27G05-FLP/(+ or Y); Bl.CyO; Dscam2.10A-Gal4/ UAS>stop>myr::smGdP-V5-*

*THS-UAS>stop>myr::smGdP-cMyc.*

2. *w, 27G05-FLP/(+ or Y); mbl<sup>e127</sup>/ mbl<sup>M100976</sup>; Dscam2.10A-Gal4/*

*UAS>stop>myr::smGdP-V5-THS-UAS>stop>myr::smGdP-cMyc.*

#### mbl ey-FLP mosaic experiments (Figure S1)

1. *w, ey-FLP; FRT42D, GMR-myr-GFP/FRT42D; Dscam2.10B-LexA, LexAop-myr-tdTomato, UAS-mCD8-GFP/+*

2. *w, ey-FLP; FRT42D, GMR-myr-GFP/FRT42D; Dscam2.10A-LexA, LexAop-myr-tdTomato, UAS-mCD8-GFP/+*

3. *w, ey-FLP; FRT42D, GMR-myr-GFP/FRT42D, Df(2R)154 ; Dscam2.10A-LexA, LexAop-myr-tdTomato, UAS-mCD8-GFP/+*
4. *w, ey-FLP; FRT42D, GMR-myr-GFP/FRT42D, mbl<sup>e27</sup>; Dscam2.10A-LexA, LexAop-myr-tdTomato, UAS-mCD8-GFP/+*
5. *w, ey-FLP; FRT42D, GMR-myr-GFP/FRT42D, mbl<sup>MI00976</sup>; Dscam2.10A-LexA, LexAop-myr-tdTomato, UAS-mCD8-GFP/+*

*mbl* expression (Figure S3)

1. *w; mbl<sup>K01212</sup>-LacZ*
2. *w; mbl<sup>NP1161</sup>-Gal4/CyO, UAS-LacZ*
3. *w; mbl<sup>MI00139</sup>-Gal4/+; UAS-CD8-GFP/+*
4. *w; mbl<sup>MI00139</sup>-Gal4/UAS-GFP.nls*
5. *w; mbl<sup>NP0420</sup>-Gal4/UAS-GFP.nls*

MB axon defects (Figure S5)

1. *w; +; +*
2. *w; +; Dscam2<sup>null</sup>/ Dscam2<sup>null</sup>*
3. *w; +; Dscam2A/ Dscam2A*
4. *w; +; Dscam2B/ Dscam2B*
5. *w; mbl<sup>e127</sup>/ mbl<sup>MI00976</sup>*
6. *w; +; +; OK107-Gal4/+*
7. *w; UAS-mbl-RNAi(v28732)/+*
8. *w; UAS-mbl-RNAi(v28732)/+; +; OK107-Gal4/+*
9. *w; P{EP}mbl<sup>B2-E1</sup>/+*
10. *w; P{EP}mbl<sup>B2-E1</sup>/+; +; OK107-Gal4/+*

11. *w; +; UAS-mblA/+*
12. *w; +; UAS-mblA/+; OK107-Gal4/+*
13. *w; +; UAS-mblB/+*
14. *w; +; UAS-mblB/+; OK107-Gal4/+*
15. *w; +; UAS-mblC/+*
16. *w; +; UAS-mblC/+; OK107-Gal4/+*
17. *w; +; UAS-MBNL1<sub>35</sub>/+*
18. *w; +; UAS-MBNL1<sub>35</sub>/+; OK107-Gal4/+*

**Figure S1.** Related to Figure 1. *Mbl* LOF results in aberrant *Dscam2.10A* reporter expression in eye mosaic clones.

(A-F) Eye mosaics of *mbl* LOF alleles cause de-repression of *Dscam2.10A>tdTom* in R cells. *WT* mosaic clones (GFP-negative) express *Dscam2.10B>tdTom* (A<sub>1</sub>-A<sub>4</sub>) but not *Dscam2.10A>tdTom* (B<sub>1</sub>-B<sub>4</sub>). *Mbl* mutant (GFP-negative) clones, *Df(2R)BSC154* show aberrant *Dscam2.10A* expression in R cells (C<sub>1</sub>-C<sub>4</sub>). (D) *mbl*<sup>e27</sup> eye clones exhibit de-repression of *Dscam2.10A* (red). (E) Clones of a *mbl* allele that deleted only a portion of all *mbl* isoforms (*mbl*<sup>M100976</sup>) do not exhibit de-repression of *Dscam2.10A*. (F) Quantification of *Dscam2.10>tdTom* expression in third instar R cells with *mbl* LOF eye mosaic clones. Y-axis represents the number of optic lobes with R cells positive for tdTom over total number of optic lobes quantified as a percentage. On the x-axis, the presence of a transgene is indicated with a grey box.

**Figure S2.** Related to Figure 1. *Mbl* LOF is associated with increased *Dscam2.10A* inclusion without affecting other *Dscam2* splicing events.

(A) *Mbl* LOF (*mbl*<sup>e127</sup>/*mbl*<sup>M100976</sup>) does not affect other *Dscam2* splicing events. Semiquantitative RT-PCR from different genotypes indicated. Primers amplified the variable region that includes exon 19S/19L or three alternative last exons (ALE). Percentage of 19L inclusion was calculated by dividing the 19L band by 19L+19S. Percentage of ALE 21A and ALE 21BL inclusion was calculated by dividing respectively the 21A and 21BL band by 21A+21BL+21BS (total). (B) Graphs of RT-PCR data from A and Figure 1P. Top graph depicts *Dscam2.10A* inclusion. Middle graph represents exon 19S inclusion. Bottom graph represents percentage inclusion of different ALEs. Plots show minimum (bottom line), mean (middle line) and maximum (top line) points, where individual points depict biological replicates.

Dashed line represents mean of control. (C) Quantitative RT-PCR of *mb1* LOF mutant (*mb1<sup>e127</sup>/mb1<sup>MI00976</sup>*) show increased exon 10A inclusion and decreased exon 10B inclusion. The left graph shows *Dscam2.10* levels compared to *synaptobrevin (nSyb)*. The middle graph shows *Dscam2.10A* levels compared to *Dscam2.10*. The right graph shows *Dscam2.10B* levels compared to *Dscam2*. Bar graph format (error bars depict standard error of means). The y-axis is the relative quantity (Rq). Dashed line represents mean of control. Unpaired t-test was conducted to compare Rq levels between control and *mb1* LOF mutants. ns  $P > 0.05$ , \*  $P < 0.05$ , \*\*  $P < 0.01$ .

**Figure S3.** Related to Figure 3. *Mbl* is expressed in R cells, neurons and glia

(A) Schematic showing the insertion locations of different *mb1* reporters. Translated regions (black) and non-translated regions (grey) are shown.

(B-D) *Mbl* is expressed in R cells (red) in third instar eye-discs (ed). The *mb1* enhancer traps *mb1<sup>K01212</sup>-LacZ* (B), *mb1<sup>NP1161</sup>-Gal4* (C) and splicing trap reporter *mb1<sup>MI00139</sup>-Gal4* (D, green) overlapped with a marker of R cells (24B10).

(E-I) *mb1<sup>MI00139</sup>>GFP.nls* is expressed in neurons and muscles. (E<sub>1</sub>-E<sub>2</sub>) Representative confocal image of a *mb1<sup>MI00139</sup>>GFP.nls* (green) adult brain co-labelled with an ELAV antibody (red). Dashed lines demarcate GFP(+) cells. Yellow solid arrowheads show GFP(+) cells that are ELAV(-). (F) Quantification of *mb1* in third instar and adult brains where ~90-100% of GFP(+) cells are also ELAV(+) (black bars). Y-axis represents the number of GFP(+) cells positive for ELAV quantified as a percentage.

(G<sub>1</sub>-G<sub>2</sub>) Representative confocal image of a *mb1<sup>MI00139</sup>>GFP.nls* adult brain labelled with a Repo antibody (red). Dashed lines demarcate GFP(+) cells. White solid arrowheads show GFP(+) cells that are positive for Repo. (H) Quantification of *mb1<sup>MI00139</sup>>GFP.nls* where ~0-10% of *mb1<sup>MI00139</sup>>GFP.nls* (+) cells are also

Repo(+). Y-axis represents the number of GFP(+) cells positive for Repo quantified as a percentage. (I<sub>1</sub>-I<sub>2</sub>) *mbt*<sup>M100139</sup>>*GFP.nls* expression is also found in third instar muscles m4-m8, m12 and m13 (Phalloidin, red).

(J<sub>1</sub>-J<sub>2</sub>) Representative confocal image of a *mbt*<sup>NP0420</sup>>*GFP.nls* (green) adult brain co-labelled with an ELAV antibody (red). Dashed lines demarcate GFP(+) cells. (K)

Quantification of *mbt*<sup>NP0420</sup>>*GFP.nls* in third instar and adult brains where ~80-90% of GFP(+) cells are also ELAV(+). (L-M) In third instar and adult brains,

*mbt*<sup>NP0420</sup>>*GFP.nls* overlaps minimally with Repo (red). (L<sub>1</sub>-L<sub>2</sub>) Representative confocal image of a *mbt*<sup>NP0420</sup>>*GFP.nls* adult brain labelled with Repo. Dashed lines demarcate GFP(+) cells. White solid arrowheads show GFP(+) cells that are positive for Repo. (M) Quantification of *mbt*<sup>NP0420</sup>>*GFP.nls* in third instar and adult brains

where ~10-15% of GFP (+) cells are also Repo(+). (N<sub>1</sub>-N<sub>2</sub>) *mbt*<sup>NP0420</sup>>*GFP.nls* expression is not detected in third instar muscles m4-m8, m12 and m13 (Phalloidin, red).

**Figure S4.** Related to Figure 3. *Mbl* expression is cell-type-specific and correlates with *Dscam2.10B*.

(A) Quantification of lamina neurons and R7-R8 neurons observed using the intersectional strategy during development. Two different *mbt* reporters were used. The transcriptional reporter labelled L4 cells early in development whereas the splicing trap reporter did not. This is most likely due to the lower efficiency of the splicing trap given that it produced 5X fewer L1 clones at 72hr compared to the transcriptional reporter. Green boxes represent detection of reporter expression at different hours after pupal formation (apf). (B) A plot of the percentage of L4 lamina



neurons over total lamina neurons during development (data from the *mb1* transcriptional reporter).

(C-E) *Mbl* is not detected in MB neurons that express *Dscam2.10A* in adults. (C<sub>1</sub>-C<sub>2</sub>) *Dscam2.10A* is expressed in  $\alpha'\beta'$  mushroom body neurons (asterisks) but not the  $\alpha\beta$  and g subsets of MB neurons labelled by Fas2 (red). Neither *Dscam2.10B* (D<sub>1</sub>-D<sub>2</sub>) nor *mb1* (E<sub>1</sub>-E<sub>2</sub>) are expressed in MB neurons. Neurons in the midline express both *Dscam2.10B* and *mb1* (white arrowhead).

**Figure S5.** Related to Figure 4. Neurons overexpressing *mb1* phenocopy *Dscam2* single isoform mutants

(A-B) MBs overexpressing *mb1* exhibit defects associated with *Dscam2* single isoform mutants. (A) A representative confocal image of control adult  $\alpha\beta$  lobes (red) with clear separation between the two  $\beta$ -lobes at the midline. (B) A representative confocal image of adult  $\alpha\beta$  lobes from an animal overexpressing *mb1A*.  $\beta$ -lobe axons inappropriately cross the midline (arrowhead). (C) Quantification of  $\beta$ -lobe axon midline crossing defects. Numbers in parentheses represent total number of MBs quantified. Fishers exact test was used to compare genotypes to their corresponding controls (white bars). ns (not significant)  $P>0.05$ , \*  $P<0.05$  and \*\*\*\*  $P<0.0001$ .

**Table S1.** Related to Figure 1. List of tested RNAi that did not de-repress *Dscam2.10A* in R cells

3rd instar

Eye mosaics (ey-FLP)

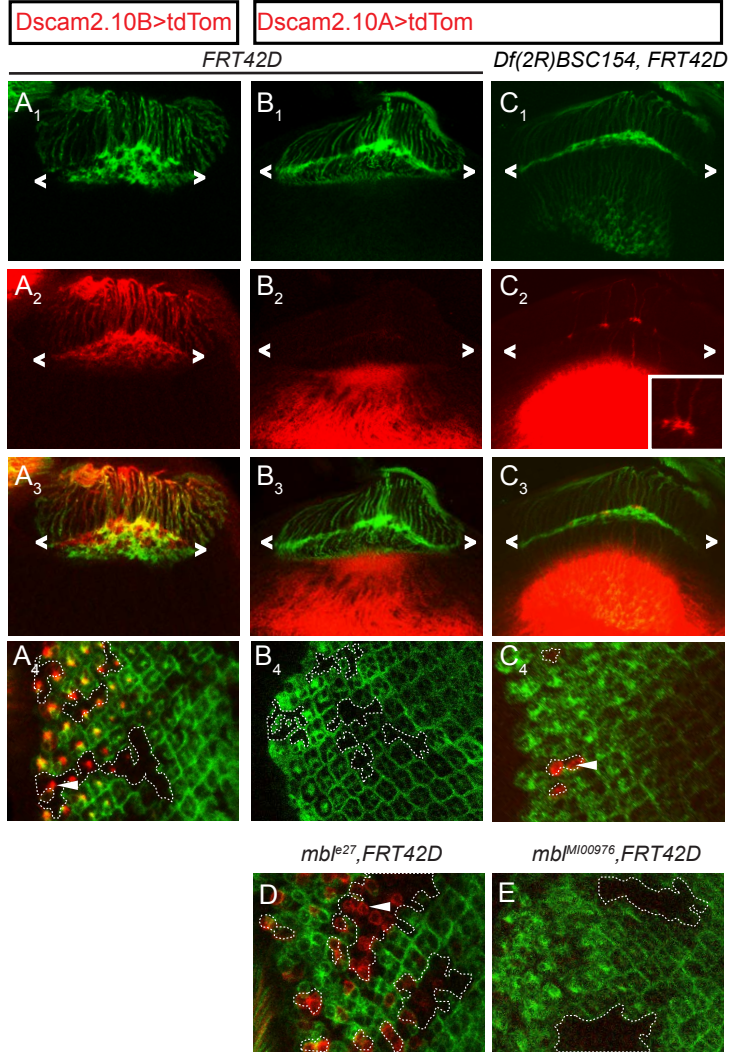

F

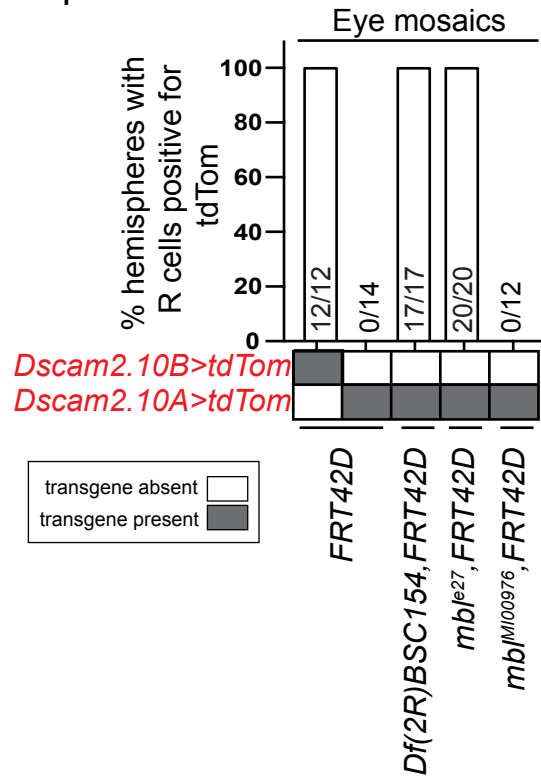

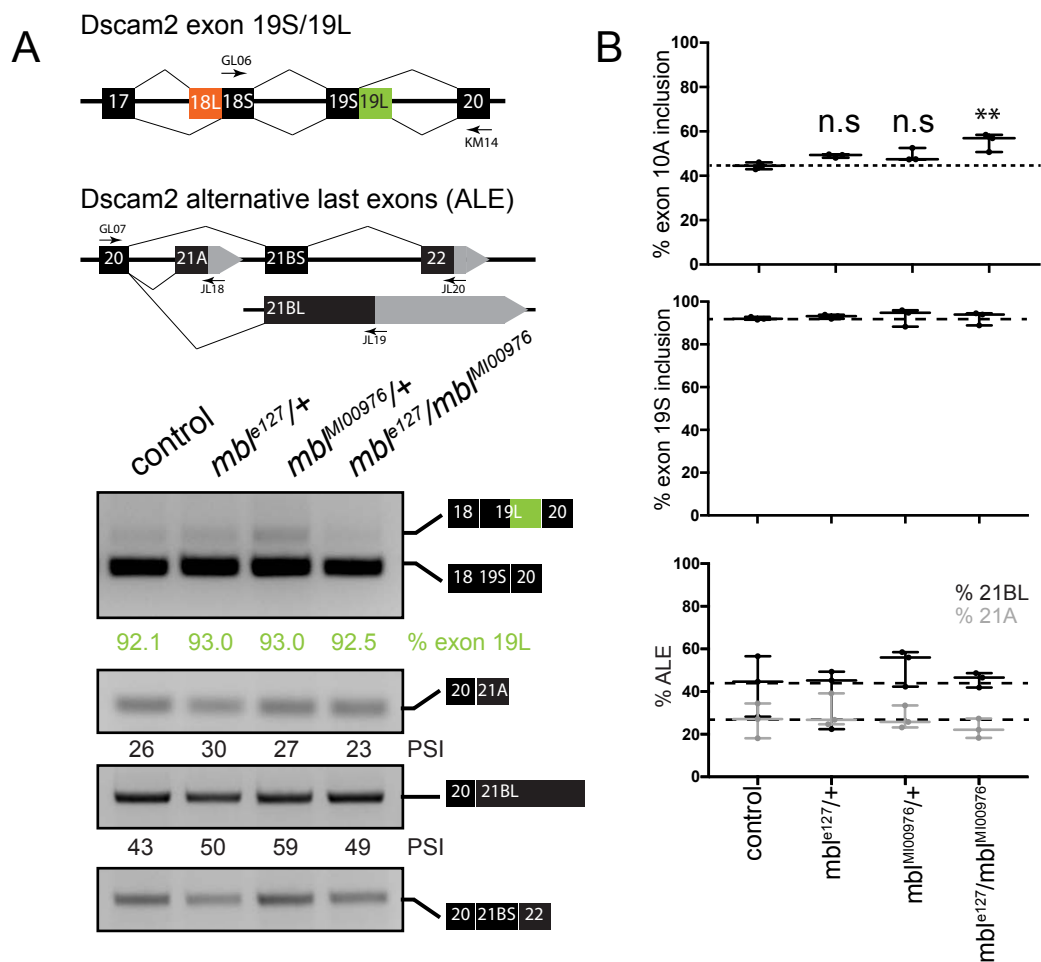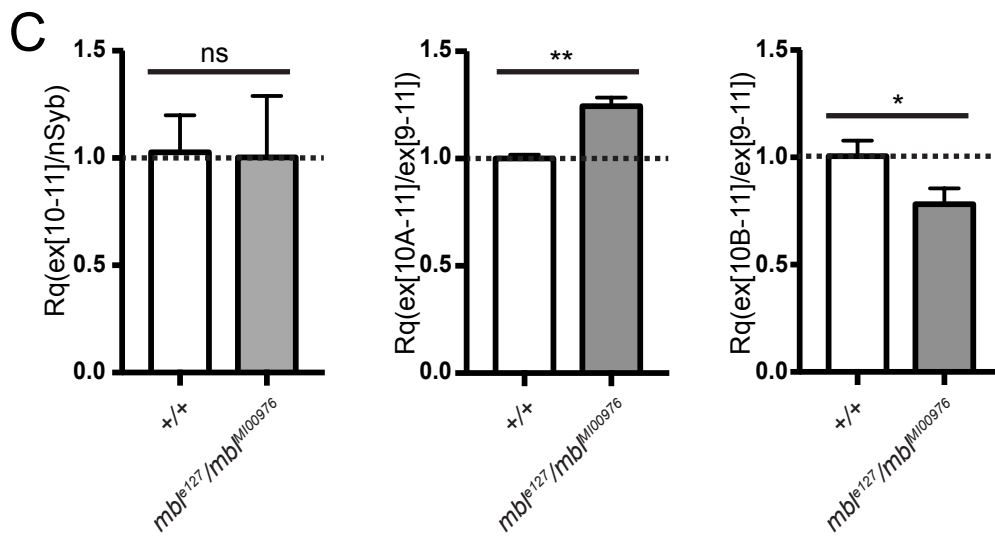

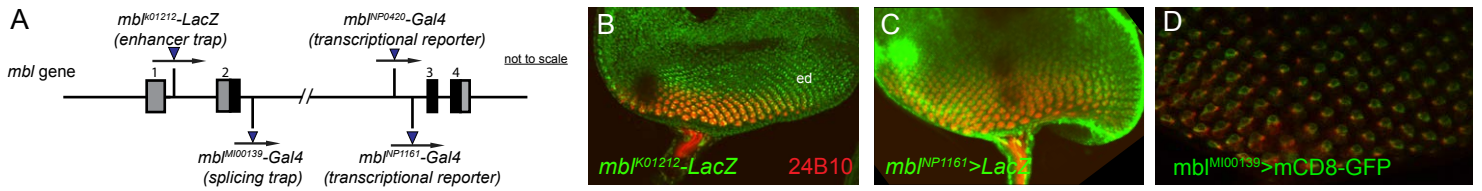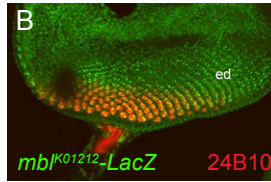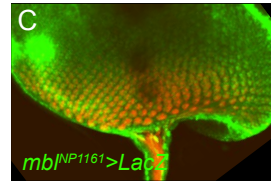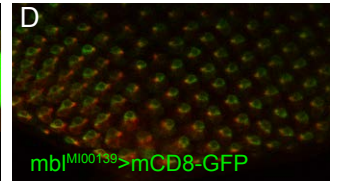

*mbI<sup>MI00139</sup>>GFP.nls*

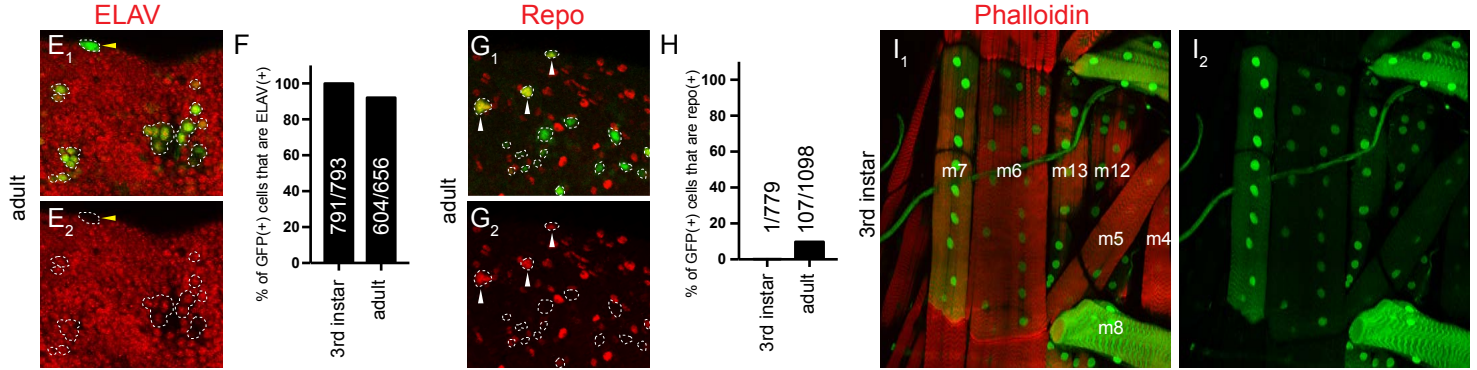

*mbI<sup>NP0420</sup>>GFP.nls*

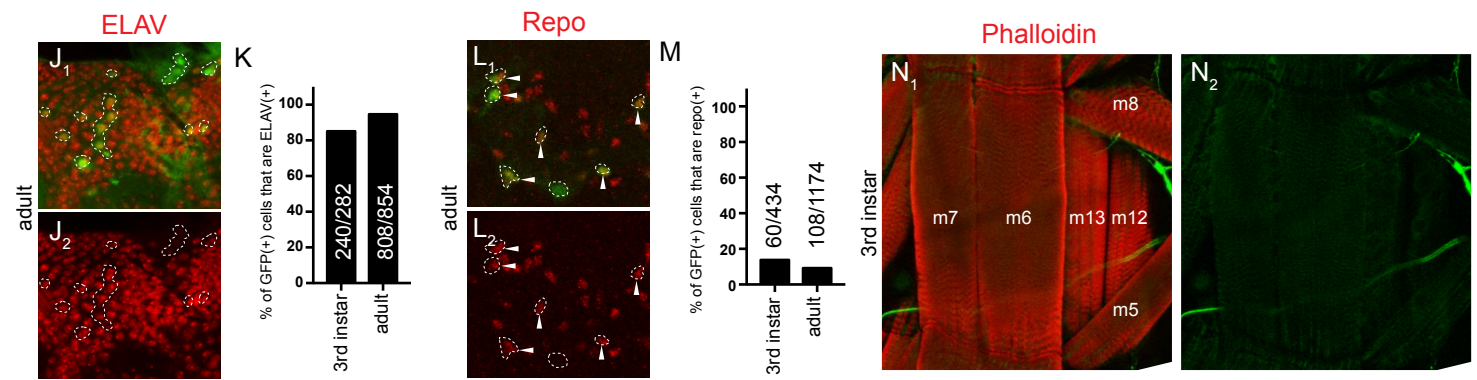

**A**

| Genotype                                    |                                   | L1     | L2 | L3 | L4 | L5 | R7 | R8 | Total | no. of OLs |   |
|---------------------------------------------|-----------------------------------|--------|----|----|----|----|----|----|-------|------------|---|
| <i>Dac-FLP(III), UAS&gt;stop&gt;epitope</i> | <i>mbI<sup>NP0420</sup>-Gal4</i>  | 72 apf | 75 | 0  | 0  | 10 | 0  | 10 | 38    | 133        | 8 |
|                                             |                                   | 60 apf | 22 | 0  | 0  | 8  | 0  | 15 | 29    | 74         | 8 |
|                                             |                                   | 48 apf | 7  | 0  | 0  | 3  | 0  | 1  | 9     | 20         | 2 |
|                                             | <i>mbI<sup>MI00139</sup>-Gal4</i> | 72 apf | 15 | 0  | 0  | 0  | 0  | 6  | 15    | 36         | 8 |
|                                             |                                   | 48 apf | 12 | 0  | 0  | 0  | 0  | 4  | 24    | 40         | 8 |

Clones detected  
 No clones detected

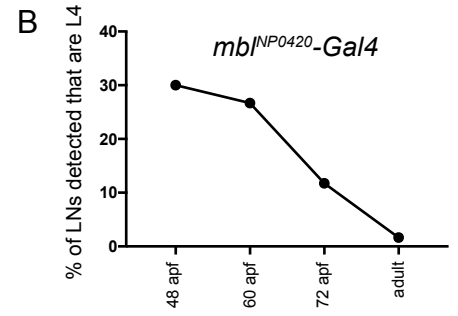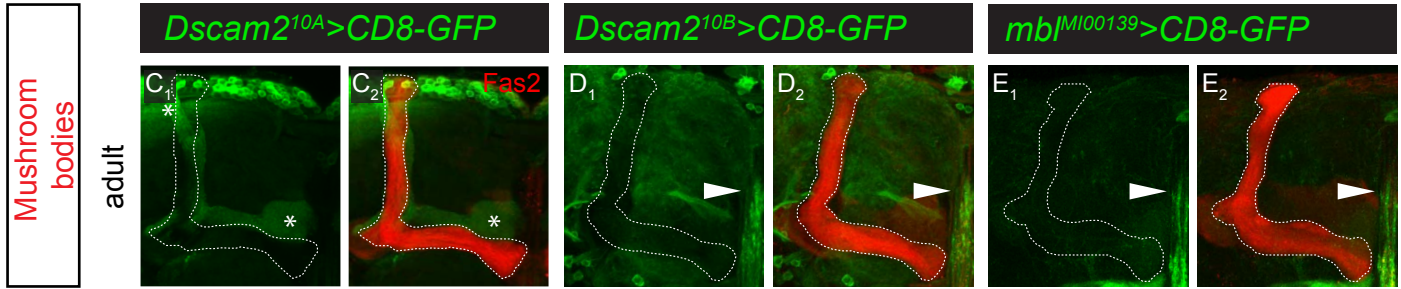

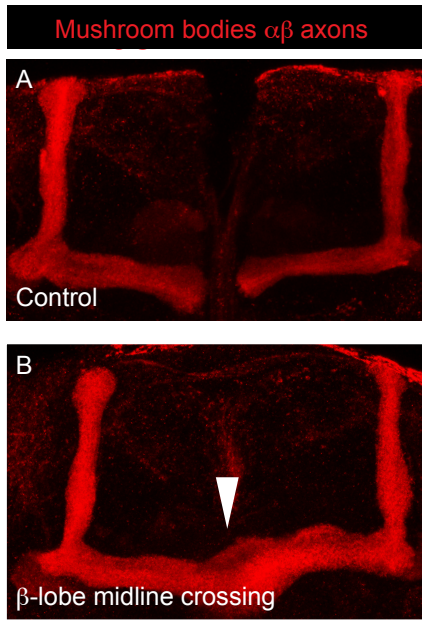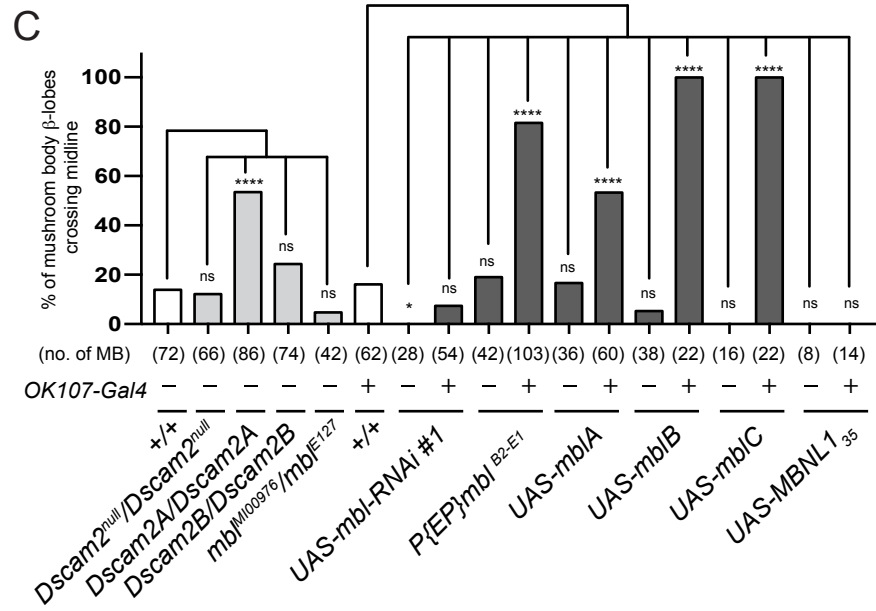

Table S1. List of tested RNAi that did not de-repress Decam2 exon 10A in R cells

| Flybase Number | CG Number | Gene Name | RNAi ID       | no. of oilied | no. of animals | Flybase Number | CG Number | Gene Name     | RNAi ID       | no. of oilied | no. of animals | Flybase Number | CG Number | Gene Name    | RNAi ID       | no. of oilied | no. of animals |
|----------------|-----------|-----------|---------------|---------------|----------------|----------------|-----------|---------------|---------------|---------------|----------------|----------------|-----------|--------------|---------------|---------------|----------------|
| FBgn0052062    | CG32062   | A2p1      | 27286         | 12            | 6              | FBgn0024698    | CG10110   | Cpsf160       | v18009        | 11            | 6              | FBgn0260944    | CG17136   | Rbp1         | v110008       | 11            | 6              |
| FBgn026239     | CG6671    | AGO1      | 33727         | 3             | 2              | FBgn0024698    | CG10110   | Cpsf160       | v110571       | 9             | 6              | FBgn0030479    | CG1987    | Rbp1-like    | v105883       | 10            | 6              |
| FBgn0000114    | CG31762   | aret      | 44483         | 18            | 9              | FBgn0261065    | CG7698    | Cpsf73        | v39558        | 9             | 5              | FBgn0030479    | CG1987    | Rbp1-like    | 44100         | 4             | 2              |
| FBgn0004587    | CG10851   | B52       | v38862        | 16            | 8              | FBgn0000377    | CG3193    | crm           | v25919        | 10            | 5              | FBgn0260944    | CG32169   | rbp6         | 61324/CyOtb   | 8             | 4              |
| FBgn0004587    | CG10851   | B52       | v38860        | 4             | 2              | FBgn0039867    | CG2261    | CaIF-50       | v43716        | 10            | 5              | FBgn0015778    | CG9412    | rin          | v3392/TM6B    | 12            | 7              |
| FBgn0037660    | CG18005   | beag      | v103832       | 8             | 4              | FBgn0039867    | CG2261    | CaIF-60       | v109583       | 8             | 4              | FBgn0003261    | CG10279   | Rm62         | v46908/TM6B   | 12            | 6              |
| FBgn0015907    | CG13425   | bl        | v2912         | 10            | 6              | FBgn0027841    | CG7697    | CaIF-64       | v210451/CyOtb | 10            | 6              | FBgn0037707    | CG16788   | RnpS1        | 56910         | 10            | 5              |
| FBgn0015907    | CG13425   | bl        | v105271       | 9             | 5              | FBgn0010220    | CG12759   | Dbp45A        | v17306        | 6             | 3              | FBgn0037707    | CG16788   | RnpS1        | 36580         | 6             | 3              |
| FBgn0262475    | CG6319    | bru-2     | 50631         | 13            | 7              | FBgn0010221    | CG12760   | Dbp45A        | v104183       | 13            | 7              | FBgn0005649    | CG5442    | Rox8         | v100563       | 10            | 5              |
| FBgn0264001    | CG43744   | bru-3     | 50734         | 8             | 4              | FBgn0033160    | CG11107   | Dhx15         | v44119/CyOtb  | 10            | 6              | FBgn0005649    | CG5442    | Rox8         | v41439        | 12            | 6              |
| FBgn0031883    | CG11266   | Caper     | 55742         | 10            | 6              | FBgn0031601    | CG3058    | Dim1          | v21258        | 10            | 5              | FBgn0011305    | CG5655    | Rsf1         | v22186/TM3    | 15            | 10             |
| FBgn0031883    | CG11266   | Caper     | 55742         | 8             | 4              | FBgn0259220    | CG42320   | Doa           | v19066        | 9             | 5              | FBgn0267790    | CG9373    | rump         | 42665/CyOtb   | 6             | 3              |
| FBgn0022942    | CG7035    | Cbp80     | v22331        | 12            | 8              | FBgn0020306    | CG9696    | dom           | v7787         | 2             | 1              | FBgn0039229    | CG6995    | Saf-8        | 51759         | 5             | 5              |
| FBgn0035136    | CG6905    | Cdc5      | v13492        | 2             | 1              | FBgn0000562    | CG4051    | egl           | 28969         | 8             | 4              | FBgn0265298    | CG5442    | SC35         | v40590        | 5             | 3              |
| FBgn0035136    | CG6905    | Cdc5      | v109369       | 10            | 5              | FBgn0001942    | CG9075    | elf-4         | v42202        | 10            | 5              | FBgn0265298    | CG5442    | SC35         | v104926       | 6             | 3              |
| FBgn0032690    | CG10333   | CG10333   | v18132        | 12            | 8              | FBgn0034237    | CG4878    | elf3-59       | 32880         | 10            | 5              | FBgn0025571    | CG5836    | SF1          | v13426        | 3             | 2              |
| FBgn0032690    | CG10333   | CG10333   | v18133        | 4             | 2              | FBgn0260400    | CG4262    | elav          | 28371         | 2             | 1              | FBgn0040284    | CG6987    | SF2          | v27775/TM3    | 13            | 7              |
| FBgn0036277    | CG10418   | CG10418   | v105940       | 11            | 6              | FBgn0033859    | CG6197    | fand          | v104186       | 10            | 5              | FBgn0040284    | CG6987    | SF2          | v27776/TM6B   | 6             | 4              |
| FBgn0037531    | CG10445   | CG10445   | v104753       | 14            | 7              | FBgn0036850    | CG10419   | Gem2          | v47372        | 13            | 8              | FBgn0052423    | CG32423   | shep         | 43545         | 4             | 3              |
| FBgn0036314    | CG10754   | CG10754   | v31346        | 11            | 8              | FBgn0036850    | CG10419   | Gem2          | v47374        | 10            | 7              | FBgn0002354    | CG1420    | Su7          | v103587       | 5             | 3              |
| FBgn0039920    | CG11360   | CG11360   | v38491        | 15            | 8              | FBgn0259139    | CG6946    | glo           | 33668         | 9             | 6              | FBgn0262601    | CG5352    | SmB          | v40587        | 3             | 2              |
| FBgn0039920    | CG11360   | CG11360   | v38492        | 11            | 6              | FBgn0259139    | CG6946    | glo           | v27752        | 12            | 6              | FBgn0262601    | CG5352    | SmB          | v110713       | 12            | 6              |
| FBgn0035692    | CG13298   | CG13298   | 55257         | 8             | 4              | FBgn0001179    | CG8019    | hay           | v41023        | 12            | 8              | FBgn0261933    | CG10753   | SmD1         | v31343/TM6B   | 8             | 4              |
| FBgn0035162    | CG13900   | CG13900   | v18955        | 9             | 6              | FBgn0014189    | CG7269    | Hel25E        | v22557        | 9             | 5              | FBgn0261933    | CG10753   | SmD1         | v31342        | 7             | 4              |
| FBgn0035163    | CG13900   | CG13900   | v108248       | 16            | 8              | FBgn0011224    | CG31000   | heph          | v33735        | 10            | 6              | FBgn0261789    | CG1249    | SmD2         | v31947        | 4             | 2              |
| FBgn0037220    | CG14641   | CG14641   | v110507/CyOtb | 11            | 6              | FBgn0011224    | CG31000   | heph          | v110749       | 18            | 10             | FBgn0261789    | CG1249    | SmD2         | v31946        | 8             | 4              |
| FBgn0038464    | CG16941   | CG16941   | v20338        | 1             | 1              | FBgn0264491    | CG10293   | how           | v13756        | 13            | 7              | FBgn0261789    | CG1249    | SmD2         | v100690       | 4             | 2              |
| FBgn0033089    | CG17266   | CG17266   | v25243        | 10            | 5              | FBgn00264491   | CG10293   | how           | v100775       | 10            | 5              | FBgn0023167    | CG8427    | SmD3         | v35933        | 8             | 5              |
| FBgn0033089    | CG17266   | CG17266   | v25244        | 2             | 1              | FBgn0004838    | CG10377   | Hrb27c_Hrp48  | v16040        | 12            | 7              | FBgn0261900    | CG18591   | SmE          | v23569        | 4             | 2              |
| FBgn0029751    | CG17764   | CG17764   | v20541        | 12            | 7              | FBgn0004838    | CG10377   | Hrb27c_Hrp48  | 31685         | 6             | 3              | FBgn0261900    | CG18591   | SmE          | v23570/TM6B   | 10            | 5              |
| FBgn0029751    | CG17764   | CG17764   | v101894       | 10            | 5              | FBgn0004838    | CG10377   | Hrb27c_Hrp48  | 33716         | 8             | 4              | FBgn000426     | CG16792   | SmF          | v107644/CyOtb | lethal        |                |
| FBgn0035271    | CG2021    | CG2021    | 28579         | 8             | 5              | FBgn0004237    | CG12749   | Hrb87F_Hrp36  | v51759        | 9             | 6              | FBgn000426     | CG16792   | SmF          | 26734         | 12            | 6              |
| FBgn0031266    | CG2807    | CG2807    | v25162        | 8             | 5              | FBgn0004237    | CG12749   | Hrb87F_Hrp36  | 52937         | 11            | 6              | FBgn0036641    | CG16725   | Smm          | v100392       | 7             | 4              |
| FBgn0037344    | CG2926    | CG2926    | v33589        | 11            | 5              | FBgn0004237    | CG12749   | Hrb87F_Hrp36  | 31244         | 14            | 8              | FBgn0003449    | CG4528    | snf          | 51549         | 16            | 8              |
| FBgn050122     | CG30122   | CG30122   | 55209         | 6             | 3              | FBgn0001215    | CG9983    | Hrb98DE_Hrp38 | 31303         | 10            | 7              | FBgn0003449    | CG4528    | snf          | 55914         | 9             | 5              |
| FBgn0031631    | CG3225    | CG3225    | v24725        | 9             | 5              | FBgn0001215    | CG9983    | Hrb98DE_Hrp38 | 32351         | 13            | 8              | FBgn0016978    | CG8749    | snRNP-U1-70K | v23150        | 11            | 8              |
| FBgn0052533    | CG32533   | CG32533   | v38634        | 1             | 1              | FBgn0015949    | CG9854    | hrd           | v42283        | 12            | 6              | FBgn0016978    | CG8749    | snRNP-U1-70K | v23151        | 10            | 6              |
| FBgn0052533    | CG32533   | CG32533   | v51785        | 11            | 6              | FBgn0002431    | CG9844    | hyd           | v44675        | 12            | 6              | FBgn0261792    | CG5654    | snRNP-U1-C   | v22132        | 11            | 6              |
| FBgn0031628    | CG3294    | CG3294    | v26111/TM6B   | 12            | 6              | FBgn0039691    | CG1972    | IntS11        | v33450        | 7             | 5              | FBgn0261792    | CG5654    | snRNP-U1-C   | v23126        | 10            | 5              |
| FBgn0031628    | CG3294    | CG3294    | v26111/TM6B   | 11            | 6              | FBgn0039691    | CG1972    | IntS11        | v109408       | 8             | 5              | FBgn0261791    | CG9742    | SNRPG        | v39253        | 10            | 5              |
| FBgn0053108    | CG33108   | CG33108   | v24996        | 9             | 5              | FBgn0036570    | CG5222    | IntS9         | v110367       | 10            | 5              | FBgn0015818    | CG3780    | Spx          | v40471        | 9             | 5              |
| FBgn0031229    | CG3436    | CG3436    | 55207/CyOtb   | 4             | 2              | FBgn0026713    | CG32604   | (1)YG0007     | v31908        | 15            | 8              | FBgn0015818    | CG3780    | Spx          | v40472        | 9             | 5              |
| FBgn0031492    | CG3542    | CG3542    | v26227        | 10            | 5              | FBgn0026714    | CG32605   | (1)YG0008     | v31909        | 4             | 2              | FBgn0263396    | CG16901   | sqd_hrp40    | v32395        | 12            | 6              |
| FBgn0031492    | CG3542    | CG3542    | v26229        | 4             | 2              | FBgn0086444    | CG10689   | (2)37Cb       | v31324        | 9             | 6              | FBgn0263396    | CG16901   | sqd_hrp40    | 31302         | 20            | 10             |
| FBgn0031493    | CG3605    | CG3605    | v26250        | 12            | 7              | FBgn0263599    | CG5931    | (3)J72Ab      | v43962        | 5             | 3              | FBgn0036340    | CG11274   | Srm160       | v6439         | 9             | 5              |
| FBgn0031493    | CG3605    | CG3605    | v26252        | 8             | 5              | FBgn0263600    | CG5932    | (3)J72Ab      | v110666       | 6             | 3              | FBgn0036340    | CG11274   | Srm160       | v100710       | 8             | 4              |
| FBgn0035987    | CG3689    | CG3689    | v45278        | 10            | 5              | FBgn0035838    | CG7942    | ltdr          | v110582       | 8             | 5              | FBgn0015298    | CG4457    | Srp19        | 51657         | 10            | 6              |
| FBgn0028474    | CG4119    | CG4119    | v26305        | 9             | 5              | FBgn0035838    | CG7942    | ltdr          | 55661         | 8             | 6              | FBgn0024285    | CG4602    | Srp54        | v51088        | 8             | 6              |
| FBgn0028474    | CG4119    | CG4119    | v106696/CyOtb | 10            | 6              | FBgn0034834    | CG3162    | L52           | v21379        | 11            | 7              | FBgn0024285    | CG4602    | Srp54        | 55254         | 9             | 5              |
| FBgn0034598    | CG4266    | CG4266    | v26472        | 14            | 7              | FBgn0034834    | CG3162    | L52           | v21380        | 14            | 7              | FBgn0026370    | CG8174    | SRPK         | v103146       | 9             | 6              |
| FBgn0034598    | CG4266    | CG4266    | v26475        | 4             | 2              | FBgn0261067    | CG4279    | Lsm11         | v28793        | 11            | 6              | FBgn0025702    | CG11489   | srpk79D      | v47544        | 8             | 5              |
| FBgn0031287    | CG4291    | CG4291    | v21819/TM6B   | 11            | 6              | FBgn0261067    | CG4279    | Lsm11         | v50653        | 10            | 5              | FBgn0025702    | CG11489   | srpk79D      | v45455        | 10            | 5              |
| FBgn0035016    | CG4612    | CG4612    | v52497        | 9             | 5              | FBgn0033450    | CG12924   | Lam11         | v108336       | 12            | 6              | FBgn0003520    | CG5753    | stau         | 31247         | 9             | 5              |
| FBgn0035666    | CG4849    | CG4849    | v21962        | 9             | 5              | FBgn0051184    | CG31184   | Lsm3          | v56892        | 4             | 2              | FBgn0003559    | CG17170   | su(f)        | 610125        | 6             | 3              |
| FBgn0032194    | CG4901    | CG4901    | v34904        | 11            | 6              | FBgn0261068    | CG13277   | Lsm7          | v23862        | 10            | 6              | FBgn0003638    | CG3019    | su(wa)       | v25597        | 12            | 9              |
| FBgn0038344    | CG5205    | CG5205    | v107282       | 9             | 5              | FBgn0011666    | CG5099    | msl           | 55152         | 10            | 5              | FBgn0003638    | CG3019    | su(wa)       | v104716       | 10            | 5              |
| FBgn0038182    | CG5728    | CG5728    | v24697        | 14            | 7              | FBgn00262737   | CG7437    | mub           | v28024        | 16            | 9              | FBgn0264270    | CG43770   | Sxl          | 34393         | 10            | 5              |
| FBgn0038927    | CG6015    | CG6015    | 34565         | 10            | 5              | FBgn0014366    | CG2925    | noi           | v20943        | 9             | 5              | FBgn0037371    | CG2097    | Syp          | v33470        | 9             | 5              |
| FBgn0030631    | CG6227    | CG6227    | v40351        | 11            | 8              | FBgn0015520    | CG10328   | non-A1        | v101567       | 7             | 4              | FBgn0038826    | CG17838   | syp          | 56972         | 10            | 5              |
| FBgn0030632    | CG6227    | CG6227    | v40352        | 12            | 6              | FBgn0015520    | CG10328   | non-A1        | 52934         | 3             | 2              | FBgn0038826    | CG17838   | syp          | v33012        | 15            | 9              |
| FBgn0004903    | CG6354    | CG6354    | 31333         | 12            | 9              | FBgn0261619    | CG5119    | pAbp          | v22007        | 9             | 5              | FBgn0025790    | CG10327   | TBPH         | v38377        | 7             | 4              |
| FBgn0004903    | CG6354    | CG6354    | 55662         | 8             | 4              | FBgn0005648    | CG2163    | Pa2p2         | v106466       | 10            | 5              | FBgn0025790    | CG10327   | TBPH         | v38379        | 10            | 5              |
| FBgn0035675    | CG6610    | CG6610    | v106830       | 10            | 6              | FBgn0086895    | CG8241    | pea           | v47782        | 9             | 5              | FBgn0003741    | CG16724   | tra          | v2560         | 12            | 6              |
| FBgn0035675    | CG6610    | CG6610    | 31870         | 10            | 6              | FBgn0027784    | CG6011    | Prp18         | v13760        | 10            | 5              | FBgn0003742    | CG10128   | tra2         | v8868         | 9             | 5              |
| FBgn0038828    | CG6841    | CG6841    | v34253/CyOtb  | 10            | 5              | FBgn0027784    | CG6011    | Prp18         | v100287       | 2             | 1              | FBgn0039117    | CG10210   | tsl          | v38566        | 8             | 4              |
| FBgn0030085    | CG6999    | CG6999    | v110143       | 11            | 7              | FBgn00261119   | CG5519    | Prp19         | v108575       | 11            | 6              | FBgn0039117    | CG10210   | tsl          | v108216       | 12            | 6              |
| FBgn0030085    | CG6999    | CG6999    | 55157         | 12            | 6              | FBgn0261119    | CG5519    | Prp19         | v41438        | 3             | 2              | FBgn0033378    | CG8781    | tsu          | 55367         | 11            | 6              |
| FBgn0035872    | CG7185    | CG7185    | v107147       | 5             | 3              | FBgn0036915    | CG7757    | Prp3          | v25548        | 9             | 6              | FBgn0033378    | CG8781    | tsu          | 28955         | 9             | 5              |
| FBgn0035872    | CG7185    | CG7185    | 34804         | 14            | 7              | FBgn0036487    | CG6876    | Prp31         | v35131        | 3             | 2              | FBgn0033210    | CG1406    | U2A          | v17358/TM6B   | 9             | 5              |
| FBgn0036734    | CG7564    | CG7564    | v100562       | 10            | 5              | FBgn0036487    | CG6876    | Prp31         | v103721       | 6             | 3              | FBgn0033210    | CG1406    | U2A          |               |               |                |
